# Supplementary material for: Arhgef15 Promotes Retinal Angiogenesis by Mediating VEGF-Induced Cdc42 Activation and Potentiating RhoJ Inactivation in Endothelial Cells
Source: PLoS One. 2012 Sep 21;7(9):e45858. doi: 10.1371/journal.pone.0045858 (PMC3448698; doi:10.1371/journal.pone.0045858)
Supplement: Dataset S1 — List of 1,623 probe sets upregulated in ECs in P8 mouse retinas. (XLS) [file pone.0045858.s012.xls]

## Sheet: P8 GFP- vs GFP+
Probe set	Name	Fold Change	Local FDR (%)
166941_f_at	EGF, latrophilin seven transmembrane domain containing 1	105.319	0.523098
104516_at	claudin 5	95.5579	6.98093
100134_at	endoglin	94.1177	11.3864
161184_f_at	tyrosine kinase receptor 1	79.0118	14.0526
109689_at	angiotensin receptor-like 1	78.2638	2.96845
110181_at	complement component 1, q subcomponent, receptor 1	75.4656	6.54787
93454_at	complement component 1, q subcomponent, receptor 1	75.2344	0
112336_at	RIKEN cDNA 8430401C09 gene	74.6455	0
102720_at	endothelial-specific receptor tyrosine kinase	71.4688	0
116603_at	RAS guanyl releasing protein 3	67.0164	2.02785
104083_at	expressed sequence AA408225	56.0367	0
114781_at	multimerin 2	53.1873	0.22335
116584_at	Transcribed sequences	52.9227	0
101393_at	annexin A3	52.9124	10.8844
110646_at	RIKEN cDNA C130074G19 gene	52.1584	9.63717
96912_s_at	cytotoxic T lymphocyte-associated protein 2 alpha	51.7271	4.03923
100927_at	phospholipid transfer protein	47.3547	12.2838
136586_at	actin related protein 2/3 complex, subunit 1B	46.5264	4.90119
167704_at	forkhead box Q1	44.2485	11.4239
111294_at	Friend leukemia integration 1	42.0851	8.52333
115840_at	RIKEN cDNA 2310061F22 gene	41.8974	0.741724
160373_i_at	serum deprivation response	41.0115	0
111466_at	mKIAA1236 protein	38.667	0.146937
94997_at	endomucin	38.4381	0
97442_at	RIKEN cDNA 4933419D20 gene	38.2617	2.34853
109824_f_at	AI835703:UI-M-AI0-aan-b-05-0-UI.s1 Mus musculus cDNA, 3' end /clone=UI-M-AI0-aan-b-05-0-UI /clone_end=3' /gb=AI835703 /gi=5469916 /ug=Mm.43072 /len=305	37.6297	1.05512
136025_at	solute carrier organic anion transporter family, member 1c1	36.1229	14.9267
162263_f_at	laminin B1 subunit 1	36.0275	9.38563
115504_g_at	dysferlin	34.9352	1.21644
171056_at	solute carrier organic anion transporter family, member 1c1	34.7049	15.3294
160319_at	SPARC-like 1 (mast9, hevin)	33.9518	13.0074
97830_at	platelet/endothelial cell adhesion molecule	33.934	9.18468
98018_at	protein C receptor, endothelial	31.8432	9.31842
98045_s_at	disabled homolog 2 (Drosophila)	31.5879	3.56602
99846_at	forkhead box F2	31.5428	0
115893_at	ecotropic viral integration site 1	31.5291	3.21375
110632_at	L259	30.767	7.60208
160255_at	expressed sequence AA589382	30.7113	9.26952
116797_at	RIKEN cDNA C130012C08 gene	30.7086	9.22499
96791_at	ESTs	28.5506	1.37299
103499_at	Von Willebrand factor homolog	28.3445	0
93185_at	expressed sequence AU021092	28.1644	0
95082_at	insulin-like growth factor binding protein 3	27.614	7.40756
102910_at	ATP-binding cassette, sub-family B (MDR/TAP), member 1A	27.0642	0
165870_i_at	SRY-box containing gene 17	26.8484	2.15193
163655_s_at	RIKEN cDNA B230340M18 gene	26.5617	0
163190_at	activin A receptor, type II-like 1	26.5456	7.17157
111711_at	immune-associated nucleotide-binding protein 9	26.3772	6.24566
162023_f_at	thrombomodulin	24.8801	4.75406
109069_at	solute carrier family 40 (iron-regulated transporter), member 1	24.736	6.80032
93884_at	endomucin	24.6262	11.8874
168500_s_at	RIKEN cDNA 2610307O08 gene	23.5112	0
113546_at	RIKEN cDNA 1300012G16 gene	23.2883	9.08946
96886_at	stabilin 1	22.9057	10.1462
103394_at	FXYD domain-containing ion transport regulator 5	22.6964	1.00161
136630_i_at	F11 receptor	22.5489	0
110503_at	solute carrier family 35, member F2	22.068	9.54074
92652_at	Notch gene homolog 4, (Drosophila)	22.0167	12.1352
96810_at	LIM only 2	21.4987	0
164116_at	FYVE, RhoGEF and PH domain containing 5	21.2811	8.18628
111402_at	cDNA sequence BC054438	21.1769	5.51301
97426_at	epithelial membrane protein 1	21.0559	0
167627_f_at	RIKEN cDNA C330016O10 gene	20.8744	1.13522
160760_at	protein tyrosine phosphatase, receptor type, K	20.6104	4.61597
96357_at	actin related protein 2/3 complex, subunit 1B (41 kDa)	20.5273	5.2322
135828_at	nitric oxide synthase trafficker	20.2685	0.12908
129232_at	RIKEN cDNA A330042I21 gene	20.2129	16.369
96065_at	latexin	20.0281	8.08248
160358_at	CD34 antigen	19.7995	5.42599
141050_at	annexin A2	19.789	8.64236
110341_at	7 days neonate cerebellum cDNA, RIKEN full-length enriched library, clone:A730046J11 product:unclassifiable, full insert sequence	19.7852	6.07303
107545_at	EGF, latrophilin seven transmembrane domain containing 1	19.6061	4.59129
169387_f_at	AV092764:AV092764 Mus musculus cDNA /clone=2310075E07 /clone_end=3' /gb=AV092764 /gi=5240312 /ug=Mm.64493 /len=296 /NOTE=replacement for probe set(s) 138268_f_at on MG-U74C	19.4607	0.125212
102208_at	sialyltransferase 10 (alpha-2,3-sialyltransferase VI)	19.195	6.244
114028_at	NADPH oxidase 4	19.0242	5.66115
163553_at	endothelial cell-specific molecule 1	18.9279	5.29776
134200_at	Transcribed sequences	18.9198	2.76604
114140_at	RIKEN cDNA A130022J15 gene	18.85	0.510588
164196_at	cDNA sequence BC020535	18.8051	0
168116_f_at	Rho GTPase activating protein 25	18.7921	1.92381
96172_at	Mus musculus, Similar to hypothetical protein FLJ11110, clone MGC:11734 IMAGE:3968418, mRNA, complete cds	18.618	2.53096
104538_at	prostaglandin I2 (prostacyclin) synthase	18.5343	0.570195
94278_at	lymphocyte cytosolic protein 1	18.3799	8.43746
162603_at	RIKEN cDNA 4632428N05 gene	18.2838	0
111137_at	ATP-binding cassette, sub-family C (CFTR/MRP), member 4	17.8283	0.000276985
102791_at	proteosome (prosome, macropain) subunit, beta type 8 (large multifunctional protease 7)	17.2294	11.6031
96785_at	RIKEN cDNA 0610013D04 gene	17.2037	3.22432
110670_at	calcitonin receptor-like	17.1827	0.00309915
165573_f_at	RIKEN cDNA 1810057C19 gene	16.904	10.9791
129827_f_at	procollagen, type IV, alpha 2	16.479	0.75154
104587_at	laminin, alpha 4	16.4742	8.4474
92996_at	SRY-box containing gene 17	16.4599	8.75146
99053_at	intercellular adhesion molecule 2	16.1546	9.05346
97967_at	RIKEN cDNA 6230425C21 gene	16.1284	3.82492
92289_at	protein tyrosine phosphatase, receptor type, B	16.0392	10.3029
102993_at	glycoprotein galactosyltransferase alpha 1, 3	16.0325	1.11459
167023_f_at	biglycan	15.6692	12.255
135171_at	tissue factor pathway inhibitor	15.5261	8.5034
104633_at	disabled homolog 2 (Drosophila)	15.4509	9.96781
114959_at	RIKEN cDNA C030045D06 gene	15.4195	5.6912
136631_r_at	F11 receptor	15.3947	0
96109_at	Kruppel-like factor 2 (lung)	14.9375	6.84822
102907_at	hypothetical protein AF506821	14.8732	0.290629
113048_at	RIKEN cDNA 1200003C23 gene	14.803	10.6753
96207_at	expressed sequence AI255215	14.4585	13.2441
112019_at	RIKEN cDNA 4631426J05 gene	14.4336	2.64509
166262_f_at	copine VIII	14.3892	0
160907_at	expressed sequence C81234	14.3384	0
115555_at	Usher syndrome 1C binding protein 1	14.274	0
101160_at	chemokine (C-X-C motif) ligand 2	14.037	14.8151
106503_at	Transcribed sequences	13.9813	6.07193
94085_at	proteoglycan, secretory granule	13.9634	5.07718
134380_at	kelch-like 6 (Drosophila)	13.9478	0.0489845
164893_f_at	proteolipid protein 2	13.8183	9.38706
102114_f_at	angiopoietin-like 4	13.7628	10.9734
112767_s_at	utrophin	13.5153	0
99491_at	interleukin 10 receptor, beta	13.4484	6.74204
101093_at	procollagen, type IV, alpha 1	13.386	4.49543
103518_at	cytotoxic T lymphocyte-associated protein 2 beta	13.1842	12.2334
92496_at	vesicle-associated membrane protein 5	13.1586	8.13626
100064_f_at	gap junction membrane channel protein alpha 1	13.0503	9.24392
106635_at	immune associated nucleotide 6	12.9309	5.58181
111925_at	cDNA sequence AK129018	12.9074	0
98600_at	S100 calcium binding protein A11 (calizzarin)	12.8933	0
107026_at	guanine nucleotide binding protein, beta 4	12.7769	6.13084
163934_at	sema domain, transmembrane domain (TM), and cytoplasmic domain, (semaphorin) 6D	12.7377	0
111365_at	Cobl-like 1	12.692	0
93078_at	lymphocyte antigen 6 complex, locus A	12.6545	8.01523
109089_at	RIKEN cDNA B130017I01 gene	12.3821	1.98487
95349_g_at	chemokine (C-X-C motif) ligand 1	12.3473	14.1191
134778_at	Transcribed sequences	12.2144	9.64554
101881_g_at	procollagen, type XVIII, alpha 1	12.1957	1.672
165664_i_at	prion protein dublet	12.194	0
116382_at	neuropilin 2	12.1654	10.1353
99577_at	kit ligand	12.1233	14.2938
162916_at	RIKEN cDNA 1700018O18 gene	12.1056	8.53918
166870_at	16 days neonate heart cDNA, RIKEN full-length enriched library, clone:D830023L12 product:unknown EST, full insert sequence	12.0336	11.6975
100915_at	myosin heavy chain IX	11.9463	4.90873
92489_at	immunity-associated protein, 38 kDa	11.9367	8.35501
110834_at	expressed sequence AI467606	11.9295	0.361223
93450_at	ESTs, Weakly similar to S28261 centromere protein E - human [H.sapiens]	11.8643	0
108312_at	RIKEN cDNA 6230424C14 gene	11.8414	7.82261
94004_at	calponin 2	11.8371	0
109748_at	RIKEN cDNA 5430401D19 gene	11.7911	10.2785
161025_f_at	SRY-box containing gene 18	11.7578	0.0248428
161099_at	ESTs	11.7421	0
105414_at	GTP cyclohydrolase 1	11.7383	1.96861
92481_at	RAD53 homolog (S. cerevisiae)	11.7183	7.07831
107622_at	cadherin 13	11.6888	8.59831
104714_at	expressed sequence AA959601	11.6182	0
163335_at	LOC381171 (LOC381171), mRNA	11.5769	5.59231
116170_at	endoglin	11.5699	3.4313
99032_at	RAS, dexamethasone-induced 1	11.5281	14.6251
103818_at	solute carrier family 7 (cationic amino acid transporter, y+ system), member 7	11.5082	12.0146
115503_at	dysferlin	11.4196	1.98826
99444_at	receptor (calcitonin) activity modifying protein 2	11.2644	12.476
166228_at	serologically defined colon cancer antigen 13	11.2506	15.004
93175_at	EST AI447490	11.1932	1.78688
101948_at	laminin B1 subunit 1	11.1699	14.5
168284_i_at	RIKEN cDNA E130012M19 gene	11.1439	0
100828_at	ESTs, Moderately similar to MLEF_MOUSE Myosin light chain 1, atrial/fetal isoform (MLC1A) (MLC1EMB) [M.musulus]	11.0193	9.80348
101487_f_at	lymphocyte antigen 6 complex, locus E	10.8926	13.1517
109099_at	transmembrane 6 superfamily member 1	10.8024	7.41393
162600_at	transforming growth factor, beta receptor II	10.7986	3.30247
97496_f_at	RIKEN cDNA 3110015B12 gene	10.7906	1.76114
162659_at	expressed sequence AI173486	10.7706	3.17019
99936_at	tyrosine kinase receptor 1	10.7332	14.5624
166453_r_at	forkhead box P1	10.7094	0
162483_f_at	procollagen, type XV	10.6832	0
165567_at	gastrin releasing peptide	10.6831	16.7042
98408_at	hematopoietically expressed homeobox	10.6756	10.9475
129194_f_at	expressed sequence AI843021	10.647	16.9681
129099_at	PDZ domain containing 3	10.6294	3.43587
165871_f_at	RIKEN cDNA 1700001C14 gene	10.5894	1.21979
167187_at	EGF-like domain 8	10.5488	3.35379
112020_g_at	RIKEN cDNA 4631426J05 gene	10.5446	1.21215
103529_at	RIKEN cDNA 2600017J23 gene	10.5379	3.44141
100065_r_at	gap junction membrane channel protein alpha 1	10.5278	13.5837
160989_r_at	expressed sequence C81222	10.5064	11.0743
93563_s_at	nidogen 2	10.4744	12.9668
102655_at	integrin alpha 4	10.4067	8.95591
108812_at	RIKEN cDNA 8430401C09 gene	10.3323	7.02496
165915_i_at	forkhead box P1	10.2827	11.4774
113931_at	expressed sequence AA959742	10.2169	10.709
163275_at	RIKEN cDNA 4932416A11 gene	10.2152	5.36753
100432_f_at	MyoD family inhibitor	10.1629	9.07077
103202_at	guanylate nucleotide binding protein 3	10.1595	8.38166
113484_at	caspase recruitment domain family, member 10	10.13	9.35645
109556_at	ectonucleotide pyrophosphatase/phosphodiesterase 3	10.0997	4.36326
107536_at	forkhead box P1	9.98061	10.5697
94294_at	cyclin B2	9.97735	1.33282
95511_at	integrin alpha 6	9.90979	4.3546
163381_at	frizzled homolog 6 (Drosophila)	9.84067	3.43423
103349_at	Yamaguchi sarcoma viral (v-yes-1) oncogene homolog	9.7317	5.08995
112918_at	centaurin, delta 1	9.72673	7.13436
104100_at	RIKEN cDNA 2310075E07 gene	9.71788	12.2411
164309_at	RIKEN cDNA E430025L02 gene	9.68126	5.25561
133835_at	AI414458:mb19f03.x1 Mus musculus cDNA, 3' end /clone=IMAGE-329885 /clone_end=3' /gb=AI414458 /gi=4257962 /ug=Mm.27452 /len=330	9.65305	1.84918
101932_at	protein tyrosine phosphatase, receptor type, E	9.56662	8.10691
100561_at	IQ motif containing GTPase activating protein 1	9.50011	2.45023
92710_at	Rho-guanine nucleotide exchange factor	9.44693	5.98431
161703_f_at	annexin A1	9.44153	13.5513
117044_at	RIKEN cDNA C130078N17 gene	9.35591	0
96285_at	myeloid-associated differentiation marker	9.31554	0
111218_at	RIKEN cDNA C730049O14 gene	9.30862	0
167430_f_at	ankyrin repeat domain 25	9.27172	0
110408_at	RIKEN cDNA D430026P16 gene	9.26217	4.35265
139194_at	phosphatidylinositol transfer protein, membrane-associated 2	9.23017	8.39234
94304_at	annexin A6	9.2127	13.6462
162972_at	endothelial cell-specific adhesion molecule	9.21169	9.45917
99158_at	SH3 domain protein 3	9.19299	4.43473
104146_at	RIKEN cDNA 2610025P08 gene	9.13631	13.1386
163902_at	apelin	9.05812	9.59542
100112_at	chemokine (C-X-C motif) ligand 12	9.05341	9.49046
109787_at	Unknown (protein for MGC:67311)	9.05286	7.48219
101001_at	RIKEN cDNA 5031439A09 gene	9.04589	7.38266
162850_at	diphtheria toxin receptor	8.99691	10.5799
165537_at	GRP1 (general receptor for phosphoinositides 1)-associated scaffold protein	8.9485	5.32108
98453_at	FMS-like tyrosine kinase 1	8.89258	3.55399
165694_at	jagged 2	8.8804	2.61833
93038_f_at	annexin A1	8.8471	13.1441
93753_at	LPS-induced TN factor	8.84544	6.29306
97357_at	myocyte enhancer factor 2C	8.75836	2.30128
160487_at	myosin light chain, alkali, cardiac atria	8.75649	12.261
101876_s_at	histocompatibility 2, T region locus 17	8.7176	11.5731
100569_at	annexin A2	8.70145	1.04199
115451_at	solute carrier family 16 (monocarboxylic acid transporters), member 4	8.66266	1.82954
105818_g_at	RIKEN cDNA C730015A04 gene	8.60588	8.65451
103816_at	Mus musculus, clone MGC:18960 IMAGE:3985305, mRNA, complete cds	8.60442	11.3712
104949_at	RIKEN cDNA E230026N22 gene	8.51492	9.92793
97773_at	CD34 antigen	8.5098	13.227
160941_at	phosphodiesterase 8A	8.50835	11.318
113016_at	Transcribed sequences	8.48619	0
114467_at	RIKEN cDNA 1110056P05 gene	8.48159	7.06485
102737_at	endothelin 1	8.46882	13.091
96049_at	biglycan	8.45511	14.1426
138796_at	thrombospondin, type I, domain 1	8.42656	13.1318
109680_at	tumor protein p53 inducible protein 11	8.39492	9.3899
164766_f_at	adenylate cyclase 4	8.38694	0.00905112
104353_at	RIKEN cDNA 2500002G23 gene	8.33218	0.278859
93885_g_at	endomucin	8.33211	0
166572_f_at	RIKEN cDNA 6230424C14 gene	8.28825	0
101039_at	procollagen, type IV, alpha 2	8.18381	12.7766
102108_f_at	myosin heavy chain IX	8.18017	5.60362
107825_at	phosphodiesterase 4B, cAMP specific	8.17586	3.1196
161969_f_at	capping protein (actin filament), gelsolin-like	8.11198	9.806
107793_at	ectonucleoside triphosphate diphosphohydrolase 1	8.10587	10.2302
102125_f_at	serine protease inhibitor 6	8.07706	6.87627
113920_at	transforming growth factor, beta receptor III	8.07392	3.80504
164885_f_at	chemokine (C-X3-C motif) ligand 1	8.04038	7.40542
93088_at	beta-2 microglobulin	8.01958	13.1849
94461_at	pre-B-cell colony-enhancing factor	7.92126	9.64762
134593_at	Adult male testis cDNA, RIKEN full-length enriched library, clone:4921526F01 product:weakly similar to PROTEIN C21ORF13 [Homo sapiens], full insert sequence	7.90085	14.6182
109367_at	niban protein	7.89071	10.6721
94928_at	tumor necrosis factor receptor superfamily, member 1b	7.872	0
94991_at	expressed sequence AW046661	7.83277	0
113141_at	RIKEN cDNA 2600017H02 gene	7.82738	4.55304
162871_at	RIKEN cDNA 1700001C14 gene	7.80006	4.31968
93037_i_at	annexin A1	7.79801	13.8574
111499_at	myosin X	7.7843	6.28356
161267_f_at	UDP-GlcNAc:betaGal beta-1,3-N-acetylglucosaminyltransferase 1	7.75218	5.38702
109390_at	sialyltransferase 10 (alpha-2,3-sialyltransferase VI)	7.72466	5.48737
164246_at	cDNA sequence BC017612	7.7014	9.86717
97918_at	expressed sequence AA536743	7.69495	0
112254_at	E26 avian leukemia oncogene 1, 5' domain	7.6391	10.6306
163724_at	RIKEN cDNA 2310032D16 gene	7.55931	9.91974
112955_at	DNA segment, Chr 10, Brigham & Women's Genetics 0792 expressed	7.54764	6.61265
163715_at	ring finger protein 125	7.49658	1.5071
107491_at	RIKEN cDNA 2010204K13 gene	7.49444	0
106661_at	MARVEL (membrane-associating) domain containing 2	7.47931	9.17593
167764_f_at	lysosomal-associated protein transmembrane 5	7.46764	11.7754
112679_at	cDNA sequence BC006779	7.44534	8.43565
115197_at	RIKEN cDNA 4931431C02 gene	7.44149	0
162892_at	PTPRF interacting protein, binding protein 1 (liprin beta 1)	7.40787	0
104221_at	solute carrier family 7 (cationic amino acid transporter, y+ system), member 5	7.38547	12.1586
114712_at	myocyte enhancer factor 2C	7.34731	9.69906
163326_i_at	peptidylprolyl isomerase (cyclophilin) like 5	7.33717	10.62
135347_at	IQ motif containing GTPase activating protein 1	7.26081	0
103817_at	cartilage associated protein	7.21294	7.04281
97930_f_at	CD151 antigen	7.20219	8.83793
135147_at	Transcribed sequences	7.17	13.3654
110318_at	CD2-associated protein	7.1685	9.29077
160532_at	tropomyosin 1, alpha	7.16691	6.59834
108012_at	roundabout homolog 4 (Drosophila)	7.14635	8.52088
97456_at	fatty acid Coenzyme A ligase, long chain 5	7.11725	0
163739_at	RIKEN cDNA 5430401D19 gene	7.10993	0
93749_at	RIKEN cDNA 1110061B18 gene	7.10689	0.154562
100116_at	RIKEN cDNA 2810417H13 gene	7.08193	12.9598
103809_r_at	dynein, cytoplasmic, intermediate chain 1	7.05139	14.1671
108891_at	Transcribed sequences	6.99277	7.01211
98868_at	B-cell leukemia/lymphoma 2	6.97681	5.59889
166768_at	RIKEN cDNA 5530401I02 gene	6.955	1.73666
115869_at	RIKEN cDNA 2010004M13 gene	6.92495	8.46839
92487_at	SRY-box containing gene 7	6.88474	6.95992
97013_f_at	cytochrome b-245, alpha polypeptide	6.86667	12.0016
101424_at	N-myc (and STAT) interactor	6.85347	7.64254
104602_at	DNA segment, Chr 2, ERATO Doi 120, expressed	6.84919	1.18207
116627_at	expressed sequence AI661274	6.8459	8.43285
98438_f_at	histocompatibility 2, Q region locus 7	6.79543	3.84883
168271_f_at	solute carrier family 1 (neutral amino acid transporter), member 5	6.76231	13.7728
161714_f_at	RIKEN cDNA 1110061B18 gene	6.74723	4.57744
116304_at	jagged 1	6.72671	10.1541
96336_at	glycine amidinotransferase (L-arginine:glycine amidinotransferase)	6.70424	11.8099
93949_at	guanine nucleotide binding protein, beta 4	6.66907	14.6769
113841_at	DNA segment, Chr 18, ERATO Doi 653, expressed	6.65783	0.100982
93323_at	proteolipid protein 2	6.64462	5.19465
93321_at	interferon activated gene 203	6.61929	3.76182
114377_at	Transcribed sequences	6.59765	1.29453
104375_at	glucosaminyltransferase, I-branching enzyme	6.59681	13.6589
112861_at	Ras association (RalGDS/AF-6) domain family 3	6.59132	9.89118
160458_at	melanoma cell adhesion molecule	6.58525	8.19477
93467_at	expressed sequence AI852726	6.58202	2.81981
111735_at	RIKEN cDNA 9830115L13 gene	6.5541	10.4818
163512_at	fos-like antigen 2	6.55024	9.44194
134075_at	RIKEN cDNA A430107J06 gene	6.52644	12.5033
111841_at	RIKEN cDNA 1200002N14 gene	6.5244	8.33546
99457_at	antigen identified by monoclonal antibody Ki 67	6.51129	3.53064
165755_r_at	RIKEN cDNA 2610305D13 gene	6.4478	15.5461
94712_at	vascular endothelial growth factor C	6.44141	0.902115
160253_at	RIKEN cDNA 1110004C05 gene	6.42735	1.29338
98129_at	thymosin, beta 10	6.42158	0
161706_f_at	laminin, gamma 1	6.398	2.15743
110529_at	desmuslin	6.39695	6.33989
104735_at	expressed sequence AU046135	6.3651	14.4446
102328_at	caspase 8	6.35166	6.87956
102095_f_at	glucosaminyltransferase, I-branching enzyme	6.34795	12.3678
104626_at	RIKEN cDNA 2700018N07 gene	6.32251	13.938
100062_at	mini chromosome maintenance deficient (S. cerevisiae)	6.30419	8.33125
94377_at	RIKEN cDNA 0610037B21 gene	6.26614	1.02662
99638_at	procollagen, type XV	6.25468	5.06613
103855_at	plectin 1	6.23507	14.7932
140820_at	Transcribed sequences	6.22465	0
166354_f_at	RIKEN cDNA 2410072D24 gene	6.22222	0
102887_at	tumor necrosis factor receptor superfamily, member 11b (osteoprotegerin)	6.1833	13.4385
116602_at	RAS guanyl releasing protein 3	6.18322	3.02115
97932_f_at	CD151 antigen	6.17288	7.11857
96132_at	ethanol induced gene product EIG180	6.15857	13.2025
93593_f_at	epithelial membrane protein 3	6.14465	4.06371
105937_at	solute carrier organic anion transporter family, member 1a4	6.14179	8.19735
112212_at	cardiomyopathy associated 4	6.12512	3.77743
114812_at	phorbol-12-myristate-13-acetate-induced protein 1	6.0445	9.41475
101593_at	cysteine rich protein 2	6.04046	13.4793
101014_at	interferon (alpha and beta) receptor 2	6.03806	0
92658_at	forkhead box Q1	6.0303	4.80371
98405_at	serine protease inhibitor 6	6.02645	6.25387
95308_at	adenylate cyclase 4	6.02094	5.88313
104227_at	G protein-coupled receptor 97	6.02055	2.61056
103723_at	interleukin 13 receptor, alpha 1	6.01759	12.0831
113043_at	RIKEN cDNA 1200008O12 gene	6.01582	8.08514
114988_at	CDNA clone IMAGE:4024374, with apparent retained intron	5.98605	4.47527
115882_at	mitogen-activated protein kinase 11	5.97947	4.80571
106970_at	RIKEN cDNA B230340M18 gene	5.97299	9.33543
167596_at	FMS-like tyrosine kinase 1	5.95671	13.594
100059_at	cytochrome b-245, alpha polypeptide	5.90192	14.0598
99509_s_at	Janus kinase 3	5.88945	11.3258
108104_at	cDNA sequence BC022623	5.85142	7.55847
111043_i_at	tripartite motif protein 34	5.83739	2.09129
167965_f_at	nuclear factor of kappa light chain gene enhancer in B-cells inhibitor, alpha	5.82274	10.909
93626_at	ATP-binding cassette, sub-family G (WHITE), member 2	5.82264	5.55785
103408_at	expressed sequence AI325941	5.80748	7.33868
95733_at	solute carrier family 29 (nucleoside transporters), member 1	5.80165	14.3958
94977_at	inositol 1,4,5-triphosphate receptor 1	5.7578	7.04721
138078_at	RIKEN cDNA 6330415F13 gene	5.75091	13.1704
116359_at	SH3-domain binding protein 5 (BTK-associated)	5.75068	3.7448
107529_at	solute carrier organic anion transporter family, member 2b1	5.72718	0
165852_at	E26 avian leukemia oncogene 1, 5' domain	5.71971	13.9616
92426_at	transmembrane 4 superfamily member 9	5.70231	2.21327
98472_at	histocompatibility 2, T region locus 23	5.68115	6.40989
161741_r_at	similar to hypothetical protein MGC2555	5.67285	12.2838
97384_at	glia maturation factor, gamma	5.64796	1.05542
162810_at	syndecan binding protein (syntenin) 2	5.6394	10.3597
104417_at	expressed sequence AI323512	5.62938	12.9301
160527_at	insulin-like growth factor binding protein 7	5.62835	12.0299
135054_r_at	solute carrier family 43, member 3	5.62209	13.6385
92562_at	nuclear, factor, erythroid derived 2, like 2	5.62098	7.54686
111336_at	selenoprotein M	5.61854	0.769075
93083_at	annexin A5	5.61566	2.63095
163318_at	Rap guanine nucleotide exchange factor (GEF) 4	5.60672	5.82842
103281_at	CD2-associated protein	5.60609	13.2248
116670_at	StAR-related lipid transfer (START) domain containing 5	5.59783	1.80133
98059_s_at	lamin A	5.59685	13.4862
100902_at	RIKEN cDNA 2610019F03 gene	5.58641	0.308883
166906_i_at	carbohydrate (N-acetylglucosamino) sulfotransferase 7	5.55919	2.23612
94332_at	E26 avian leukemia oncogene 1, 5' domain	5.54463	14.1083
98469_at	serine/threonine kinase 5	5.53625	8.5112
168499_s_at	ring finger protein 125	5.51378	2.2243
166220_r_at	hypothetical protein C130036J11	5.50156	10.3396
110830_at	RIKEN cDNA E430025L02 gene	5.4845	3.03945
133673_f_at	type 1 tumor necrosis factor receptor shedding aminopeptidase regulator	5.4724	15.6487
93451_at	EST C78582	5.46563	4.43147
167488_f_at	SH3 domain binding glutamic acid-rich protein-like 3	5.46555	1.12569
111044_f_at	tripartite motif protein 34	5.46461	0
112828_at	podocalyxin-like	5.46413	6.60004
110839_at	RIKEN cDNA C130040I11 gene	5.45629	5.71529
99133_at	solute carrier family 3 (activators of dibasic and neutral amino acid transport), member 2	5.4462	10.453
94223_at	neuroepithelial cell transforming gene 1	5.42872	13.5788
140991_at	AI429730:mf89c10.x1 Mus musculus cDNA, 3' end /clone=IMAGE-421458 /clone_end=3' /gb=AI429730 /gi=4275656 /ug=Mm.73637 /len=382	5.41747	3.43188
95637_at	expressed sequence AL024016	5.41526	1.38733
108848_g_at	proteolipid protein 2	5.41409	7.95279
112322_at	expressed sequence AI662270	5.3931	10.5631
167528_at	hyaluronan and proteoglycan link protein 3	5.38071	16.2272
104628_at	mannosidase 2, alpha 1	5.36505	0.779758
93085_at	proteosome (prosome, macropain) subunit, beta type 9 (large multifunctional protease 2)	5.36149	14.7393
113823_at	lens intrinsic membrane protein 2	5.34833	8.02093
103421_at	stromal cell derived factor receptor 2	5.34073	0
105819_at	RIKEN cDNA C730015A04 gene	5.34061	9.75908
111062_at	cDNA sequence BC014699	5.33791	2.21585
93865_s_at	histocompatibility 2, T region locus 10	5.31815	10.9917
129023_at	rhomboid family 1 (Drosophila)	5.31619	13.7401
97711_at	ESTs, Weakly similar to hypothetical protein FLJ14054 [Homo sapiens] [H.sapiens]	5.3153	2.07164
170953_f_at	mitogen-activated protein kinase 12	5.30745	0
97540_f_at	histocompatibility 2, D region locus 1	5.30674	0
138969_at	AI852231:UI-M-BH0-ajc-f-10-0-UI.s1 Mus musculus cDNA, 3' end /clone=UI-M-BH0-ajc-f-10-0-UI /clone_end=3' /gb=AI852231 /gi=5496137 /ug=Mm.41635 /len=471	5.29727	13.1068
97994_at	transcription factor 7, T-cell specific	5.25865	4.47172
102815_at	annexin A11	5.25359	3.23044
104408_s_at	SRY-box containing gene 18	5.23024	13.0998
109311_at	RIKEN cDNA C030025P15 gene	5.23017	9.33723
133743_at	platelet-derived growth factor, D polypeptide	5.21819	16.9292
137492_at	baculoviral IAP repeat-containing 4	5.20381	0.303307
95670_at	stathmin-like 2	5.19939	0
112729_at	cDNA sequence BC038614	5.19447	7.51072
112671_at	RIKEN cDNA 1600029O10 gene	5.19386	10.4646
160496_s_at	mini chromosome maintenance deficient (S. cerevisiae)	5.18392	12.6479
104415_at	RIKEN cDNA 3110052D19 gene	5.181	3.80425
93511_at	integral membrane protein 2A	5.18005	6.39859
103007_at	ephrin A1	5.17155	4.38578
168307_i_at	expressed sequence AI256711	5.16755	5.2563
110567_at	RIKEN cDNA 6620401D04 gene	5.15819	9.56804
110608_at	RIKEN cDNA 2700043M03 gene	5.15424	9.66379
103511_at	hypothetical protein MGC32512	5.14464	14.3334
166417_at	calcium/calmodulin-dependent protein kinase kinase 2, beta	5.14253	11.0056
101030_at	ras homolog gene family, member AB	5.13995	11.7361
114749_at	G protein-coupled receptor 23	5.13061	6.97307
161384_r_at	immunity-associated protein, 38 kDa	5.12423	2.14561
167141_f_at	transgelin 2	5.12101	15.8267
116109_at	RIKEN cDNA 2010005A06 gene	5.09984	9.64575
98840_at	BMX non-receptor tyrosine kinase	5.09509	12.0149
93120_f_at	histocompatibility 2, K region	5.08193	0
93283_at	adenine phosphoribosyl transferase	5.06972	8.91773
101851_at	antigen identified by monoclonal antibody MRC OX-2	5.06861	9.85971
131166_at	RIKEN cDNA A130009K11 gene	5.04997	13.5431
115679_at	ATPase, Class V, type 10D	5.02798	1.55013
167841_at	SH3 domain protein 1B	5.01227	8.32523
115045_at	RIKEN cDNA 9930012K11 gene	5.00776	0
116786_at	CD109 antigen	5.00722	7.54779
104300_at	IQ motif containing GTPase activating protein 1	5.00378	5.1541
164307_f_at	myosin IE	5.00102	10.1721
95016_at	neuropilin	4.97214	4.77716
111863_at	fibroblast growth factor receptor-like 1	4.97188	8.89988
95543_at	ESTs, Moderately similar to S11390 tropomyosin 5 - mouse [M.musulus]	4.94457	8.81396
98427_s_at	nuclear factor of kappa light chain gene enhancer in B-cells 1, p105	4.91823	5.14196
162449_f_at	adrenomedullin receptor	4.91166	12.1651
171518_i_at	AV092700:AV092700 Mus musculus cDNA /clone=2310074N16 /clone_end=3' /gb=AV092700 /gi=5240248 /ug=Mm.53283 /len=292 /NOTE=replacement for probe set(s) 139944_at on MG-U74C	4.87668	15.0678
96168_at	kinesin-like 5 (mitotic kinesin-like protein 1)	4.85095	10.7872
99622_at	Kruppel-like factor 4 (gut)	4.83145	12.1128
111360_at	RIKEN cDNA 1500005K14 gene	4.8067	0.363931
97429_at	SNF related kinase	4.79977	0
93550_at	cysteine-rich protein 2	4.79839	5.87168
162639_at	fibulin 5	4.79337	3.6072
167261_f_at	biliverdin reductase B (flavin reductase (NADPH))	4.78123	17.1455
98031_at	Bcl-2-related ovarian killer protein	4.77956	9.73619
92877_at	transforming growth factor, beta induced, 68 kDa	4.77453	12.1667
115119_at	WD repeat and FYVE domain containing 1	4.76389	0
100959_at	S100 calcium binding protein A13	4.74754	1.06679
100120_at	nidogen 1	4.7388	11.649
94383_at	tissue factor pathway inhibitor 2	4.73833	0
162234_f_at	chemokine (C-X-C motif) ligand 12	4.73249	7.62298
166994_f_at	lymphoblastomic leukemia	4.72877	0
160961_at	ESTs, Weakly similar to SPA1_MOUSE GTPase-activating protein Spa-1 [M.musulus]	4.72646	9.82571
109140_at	tumor necrosis factor, alpha-induced protein 1 (endothelial)	4.72618	3.69619
104445_at	RIKEN cDNA 4631408O11 gene	4.72176	6.35257
163285_at	retinoic acid induced 14	4.72107	4.08276
161121_f_at	S100 calcium binding protein A13	4.7156	0
168330_f_at	aurora kinase B	4.71207	15.5504
165792_at	disabled homolog 2 (Drosophila)	4.71143	0
165404_i_at	RIKEN cDNA 0610011F06 gene	4.70853	2.99144
97473_at	transmembrane 4 superfamily member 7	4.69755	3.24921
92962_at	tumor necrosis factor receptor superfamily, member 5	4.69543	0
95542_at	ESTs, Moderately similar to S11390 tropomyosin 5 - mouse [M.musulus]	4.69509	4.56718
165089_f_at	RIKEN cDNA 1300014I06 gene	4.68963	2.1995
115675_at	DEAD (Asp-Glu-Ala-Asp) box polypeptide 10	4.68439	0
105325_at	similar to olfactory receptor MOR256-23	4.65771	6.60456
115922_i_at	cadherin 13	4.63962	5.25178
103606_r_at	regulator of G-protein signaling 19	4.63792	3.36035
162947_at	expressed sequence AW547365	4.63702	10.6274
94189_at	BcL6-associated zinc finger protein	4.61985	0
160367_at	RIKEN cDNA 2410002J21 gene	4.61061	4.56504
102318_at	sialyltransferase 8 (alpha-2, 8-sialyltransferase) D	4.60752	3.75623
169667_f_at	annexin A5	4.60022	6.68443
111430_r_at	membrane metallo endopeptidase	4.59926	0
99935_at	tight junction protein 1	4.59741	0
108084_at	angiomotin-like 1	4.58331	7.80793
92214_at	cathepsin W	4.57593	9.51717
114045_at	N-sulfoglucosamine sulfohydrolase (sulfamidase)	4.57373	9.97943
166673_at	DNA segment, Chr 11, ERATO Doi 759, expressed	4.55862	11.1337
110593_at	hypothetical protein E030010A14	4.55675	0.172503
93290_at	purine-nucleoside phosphorylase	4.55669	12.3659
168434_r_at	ephrin A1	4.55019	0.949506
160579_at	mannosidase 1, alpha	4.54624	3.13355
104168_at	ARP2 actin-related protein 2 homolog (yeast)	4.53868	11.601
114598_at	retinoic acid induced 14	4.53802	1.22033
162721_at	RIKEN cDNA 0610039K22 gene	4.5325	10.7021
161648_at	complement receptor related protein	4.52804	9.3914
136103_at	Transcribed sequences	4.50092	6.24355
162753_at	RIKEN cDNA 1200013A08 gene	4.49875	7.88016
93376_at	expressed sequence AA673486	4.49724	13.1605
113759_at	phosphodiesterase 4B, cAMP specific	4.49082	9.29584
107986_at	lymphocyte antigen 6 complex, locus E	4.48825	8.63235
114602_at	expressed sequence AW228836	4.48811	10.5274
166096_f_at	RIKEN cDNA 2900054P12 gene	4.48052	9.78681
113651_at	RIKEN cDNA 2310042L19 gene	4.47775	3.80325
92730_at	heparin binding epidermal growth factor-like growth factor	4.45901	14.4207
161817_f_at	RIKEN cDNA 4930422J18 gene	4.45327	13.8752
97527_at	RIKEN cDNA 1110038L14 gene	4.43887	3.79035
95022_at	A kinase (PRKA) anchor protein (gravin) 12	4.42017	14.3536
134219_at	Transcribed sequences	4.39964	1.73695
103922_f_at	RIKEN cDNA 1500005G05 gene	4.39656	11.7079
105041_at	RIKEN cDNA 5033414D05 gene	4.38056	10.4118
93411_at	ESTs	4.34304	6.45224
96343_at	actinin alpha 4	4.33642	12.5482
94020_at	protein typrotein tyrosine kinase 9-like (A6-related protein)	4.32811	11.9102
163391_at	transmembrane 4 superfamily member 9	4.31636	4.26263
102255_at	oncostatin receptor	4.31444	7.33918
114784_at	growth factor receptor bound protein 14	4.30482	7.98518
114562_at	low density lipoprotein receptor-related protein 4	4.30191	3.60348
108723_at	similar to KIAA1602 protein	4.29976	10.5855
109721_at	myosin heavy chain 10, non-muscle	4.29617	5.82847
109377_at	Rap guanine nucleotide exchange factor (GEF) 3	4.28755	0.208322
160580_at	mannosidase 1, alpha	4.27785	1.08602
105817_at	RIKEN cDNA C730015A04 gene	4.2649	9.42388
93441_at	RIKEN cDNA 2700099C18 gene	4.26371	9.55097
94147_at	serine (or cysteine) proteinase inhibitor, clade E, member 1	4.24451	10.6876
115354_at	sphingomyelin phosphodiesterase, acid-like 3B	4.24261	5.95746
113568_at	Transcribed sequences	4.24069	5.80278
117235_at	calcium/calmodulin-dependent protein kinase kinase 2, beta	4.21834	9.06112
134818_at	RIKEN cDNA 4930572I07 gene	4.20618	12.2431
99322_at	potassium voltage-gated channel, subfamily Q, member 1	4.20448	11.818
97963_at	signal-induced proliferation associated gene 1	4.20209	13.966
112468_at	LIM and senescent cell antigen-like domains 1	4.18984	9.73006
110217_at	palmdelphin	4.18784	8.56412
161013_f_at	expressed sequence AI596360	4.17722	14.07
104909_at	toll-like receptor 3	4.17164	9.7022
101984_at	ATX1 (antioxidant protein 1) homolog 1 (yeast)	4.16432	14.7233
160679_at	Mus musculus, clone MGC:28766 IMAGE:4485843, mRNA, complete cds	4.16362	14.3537
166376_f_at	RIKEN cDNA 2310046K01 gene	4.15644	2.16239
133372_f_at	AW210035:ul50b08.y1 Mus musculus cDNA, 5' end /clone=IMAGE-2101719 /clone_end=5' /gb=AW210035 /gi=6515975 /ug=Mm.26024 /len=480	4.15372	12.6182
93670_at	Est2 repressor factor	4.14858	14.2335
166998_f_at	phosphodiesterase 2A, cGMP-stimulated	4.13992	12.8719
111459_at	RIKEN cDNA A630080F05 gene	4.1264	9.92287
167384_s_at	serum deprivation response	4.12406	0.00971845
133339_r_at	Transcribed sequence with strong similarity to protein sp:P00722 (E. coli) BGAL_ECOLI Beta-galactosidase	4.12219	15.369
98330_at	zinc finger protein of the cerebellum 3	4.11347	5.82076
168205_i_at	Transcribed sequences	4.11319	0
104729_at	gap junction membrane channel protein alpha 4	4.10455	12.7996
93714_f_at	histocompatibility 2, L region	4.10069	7.54803
160977_at	Rho guanine nucleotide exchange factor (GEF) 5	4.08526	14.2813
101441_i_at	inositol 1,4,5-triphosphate receptor 5	4.07385	10.7835
104579_r_at	actinin, alpha 1	4.07374	7.72474
116210_at	purinergic receptor P2X, ligand-gated ion channel, 7	4.06434	2.34348
100880_at	ESTs, Weakly similar to lysophospholipase 1; phospholipase 1a; lysophopholipase 1 [Mus musculus] [M.musulus]	4.06188	14.3701
112699_at	deleted in liver cancer 1	4.06071	8.27833
104627_at	RIKEN cDNA 5730450N06 gene	4.05824	5.05589
92665_f_at	X-linked lymphocyte-regulated complex	4.05765	10.9692
97890_at	serum/glucocorticoid regulated kinase	4.05516	10.9556
96060_at	serine (or cysteine) proteinase inhibitor, clade B, member 6	4.05221	14.6855
93938_at	solute carrier family 30 (zinc transporter), member 1	4.0477	1.71394
103549_at	nestin	4.04518	14.4223
102327_at	amine oxidase, copper containing 3	4.04474	10.6652
108478_f_at	purinergic receptor (family A group 5)	4.03784	8.6887
100475_at	tripartite motif protein 25	4.03755	1.62564
115994_at	Transcribed sequences	4.03435	10.4296
114977_at	RIKEN cDNA 4933417E01 gene	4.01893	0.636505
114330_at	discoidin, CUB and LCCL domain containing 1	4.0185	1.38259
106569_at	myotubularin related protein 2	4.00692	6.01757
113762_at	expressed sequence AI480535	3.98958	9.1661
162074_r_at	glutamate receptor, ionotropic, kainate 5 (gamma 2)	3.98048	3.48608
104525_at	RIKEN cDNA 2810423O19 gene	3.97511	1.83
129284_at	RIKEN cDNA 9630023C09 gene	3.96397	2.21101
170223_f_at	SH3 domain binding glutamic acid-rich protein-like 3	3.95828	0
161820_f_at	GATA binding protein 2	3.95659	9.21073
92907_at	occludin	3.9525	14.0578
106086_at	G protein-coupled receptor 4	3.92955	7.49573
105025_at	AA275270:vc04e05.r1 Mus musculus cDNA, 5' end /clone=IMAGE-765536 /clone_end=5' /gb=AA275270 /gi=1915748 /ug=Mm.34698 /len=408	3.90539	8.90648
98498_at	caspase 7	3.9004	12.2901
99584_at	kangai 1 (suppression of tumorigenicity 6, prostate)	3.89434	13.437
108764_at	Unknown (protein for IMAGE:6825008)	3.88864	10.2188
112351_at	expressed sequence AI844632	3.88762	9.38878
101554_at	nuclear factor of kappa light chain gene enhancer in B-cells inhibitor, alpha	3.885	13.8439
116461_at	thrombospondin, type I, domain 1	3.87424	6.13009
110297_at	RIKEN cDNA 2410030K01 gene	3.8418	8.60391
161819_f_at	lysosomal-associated protein transmembrane 5	3.83786	5.05867
100468_g_at	lymphoblastomic leukemia	3.82121	4.7257
114550_at	centaurin, delta 1	3.81624	4.10681
102789_at	GATA binding protein 2	3.79494	12.1896
116979_at	solute carrier family 39 (zinc transporter), member 10	3.7807	6.6835
105143_at	calponin homology (CH) domain containing 1	3.77555	3.08097
102195_at	mitogen-activated protein kinase kinase kinase kinase 4	3.76624	1.30506
99082_at	FK506 binding protein 10 (65 kDa)	3.76451	12.7433
133563_at	Transcribed sequences	3.75887	15.3102
105159_at	Bcl2 modifying factor	3.75821	3.90253
104017_at	fatty acid-Coenzyme A ligase, long chain 4	3.7512	9.08623
114854_at	Transcribed sequences	3.74897	7.26102
160146_r_at	polymerase (RNA) II (DNA directed) polypeptide C	3.73253	10.4546
164299_f_at	kinesin-like 7	3.73161	4.62084
116934_at	coatomer protein complex, subunit gamma 2, antisense 2	3.7308	6.86377
97360_at	RIKEN cDNA 9430096L06 gene	3.72963	13.643
98869_g_at	B-cell leukemia/lymphoma 2	3.71681	14.287
95425_at	acetyl-Coenzyme A dehydrogenase, long-chain	3.71566	7.08282
102052_at	RIKEN cDNA 1300003D03 gene	3.71168	10.639
168130_f_at	LIM domain containing preferred translocation partner in lipoma	3.69266	0
170736_at	protein geranylgeranyltransferase type I, beta subunit	3.68415	0
113985_at	RIKEN cDNA 1110007F12 gene	3.68298	8.06243
163929_at	cDNA sequence BC003323	3.68163	1.48264
136535_at	RIKEN cDNA 4930420O11 gene	3.68131	8.04564
95102_at	RIKEN cDNA 2310008D10 gene	3.67823	6.96235
97238_at	transforming, acidic coiled-coil containing protein 3	3.67507	13.2884
114108_at	RIKEN cDNA E030003N15 gene	3.66619	10.3497
111682_at	RIKEN cDNA 2010005O13 gene	3.66245	5.86613
113283_at	EST AA175286	3.65306	8.2911
94246_at	E26 avian leukemia oncogene 2, 3' domain	3.64797	11.3738
111379_at	EH-domain containing 4	3.64554	0
164509_i_at	AV290504:AV290504 Mus musculus cDNA, 3' end /clone=5133401M03 /clone_end=3' /gb=AV290504 /gi=6304535 /ug=Mm.61701 /len=290 /NOTE=replacement for probe set(s) 106330_f_at on MG-U74B	3.6338	10.683
101078_at	basigin	3.63057	10.3973
113517_at	expressed sequence AU045128	3.62485	10.7197
100071_at	major urinary protein 2	3.62201	6.10297
139180_at	RIKEN cDNA 4930565F05 gene	3.61949	0.612472
164690_at	uveal autoantigen with coiled-coil domains and ankyrin repeats	3.61891	6.37012
130121_at	cDNA sequence BC011487	3.61456	9.9228
104645_at	Kruppel-like factor 7 (ubiquitous)	3.61048	9.62612
94839_at	nucleobindin	3.61045	9.11322
101442_f_at	inositol 1,4,5-triphosphate receptor 5	3.60677	2.34899
96271_at	RIKEN cDNA 2310075C12 gene	3.60633	7.86531
116124_at	expressed sequence AU022351	3.60384	8.77883
116860_at	LIM domain containing preferred translocation partner in lipoma	3.59088	8.71355
92997_g_at	SRY-box containing gene 17	3.58578	13.5059
113309_at	START domain containing 8	3.58562	0
96135_at	RIKEN cDNA 3110003A17 gene	3.57985	8.89212
135221_at	urate oxidase	3.57982	2.8867
106222_at	lipoma HMGIC fusion partner-like 2	3.57886	7.30176
99452_at	liver-specific bHLH-Zip transcription factor	3.57562	14.6573
161627_r_at	expressed sequence AI325941	3.57451	9.6086
94445_at	expressed sequence AI115446	3.57436	10.6753
109371_at	solute carrier organic anion transporter family, member 2a1	3.56759	8.43256
160359_at	RIKEN cDNA 1190002H23 gene	3.56203	13.6021
116371_at	RIKEN cDNA 4632417K18 gene	3.56165	10.0025
98452_at	FMS-like tyrosine kinase 1	3.55912	8.10463
161301_f_at	lectin, galactose binding, soluble 9	3.55736	13.9714
161931_r_at	antigen identified by monoclonal antibody Ki 67	3.55654	13.5162
96843_at	RIKEN cDNA 2700069E09 gene	3.55611	8.98922
115344_at	regulator of G-protein signaling 3	3.55567	0
106518_at	EH-domain containing 4	3.55485	0.569004
111258_at	RIKEN cDNA 3110082I17 gene	3.55201	1.29847
108541_at	RIKEN cDNA 4732495E13 gene	3.55076	7.79297
109301_i_at	type 1 tumor necrosis factor receptor shedding aminopeptidase regulator	3.54716	7.03945
111765_at	hypothetical protein 5430421B17	3.54673	10.4173
169651_i_at	cDNA sequence BC055915	3.54542	15.8236
95062_at	calpastatin	3.54133	3.37343
112021_at	RIKEN cDNA 4631426J05 gene	3.54102	7.01008
102397_at	core-binding factor, runt domain, alpha subunit 2; translocated to, 3 homolog (human)	3.53511	13.517
111976_at	RIKEN cDNA 2310043N13 gene	3.53389	10.2111
95627_at	RIKEN cDNA 2310058J06 gene	3.53308	0.559447
103636_at	brain protein 17	3.53186	14.5583
117108_at	expressed sequence AI595338	3.53151	3.86342
162943_r_at	sperm specific antigen 2	3.52424	6.3611
169378_at	RIKEN cDNA 2510002A14 gene	3.52367	12.5266
92188_s_at	feline sarcoma oncogene	3.52118	12.5184
171248_f_at	feline sarcoma oncogene	3.51815	6.25658
116456_at	solute carrier family 16 (monocarboxylic acid transporters), member 6	3.51467	7.42826
97541_f_at	histocompatibility 2, D region locus 1	3.5144	1.11173
135343_r_at	Tal1 interrupting locus	3.51014	16.2361
103080_at	SAM domain and HD domain, 1	3.50024	2.60406
98942_r_at	RIKEN cDNA 2310032D16 gene	3.49647	9.99987
166442_f_at	Hypothetical gene supported by BC030430 (LOC382098), mRNA	3.49265	12.1583
101584_at	Ras suppressor protein 1	3.48966	5.13943
160137_at	UDP-GlcNAc:betaGal beta-1,3-N-acetylglucosaminyltransferase 1	3.48792	0.0658465
164908_f_at	RIKEN cDNA 1810036L03 gene	3.48548	9.7318
92805_s_at	ADP-ribosylation-like 4	3.48476	12.8018
94284_at	diaphorase 1 (NADH)	3.48337	7.32432
164757_at	RIKEN cDNA 5830458K16 gene	3.47694	10.2863
98514_at	tissue factor pathway inhibitor	3.47084	2.55806
135704_at	protein tyrosine phosphatase, receptor type, K	3.46928	3.24429
99596_f_at	guanine nucleotide binding protein, alpha inhibiting 2	3.46487	0
101551_s_at	testis derived transcript	3.4632	11.9782
94972_at	RNA binding motif, single stranded interacting protein 1	3.45691	8.70035
129021_at	RIKEN cDNA 9530010C24 gene	3.45184	0.622093
163141_at	Rho GTPase activating protein 18	3.44865	6.23412
107626_at	decay accelerating factor 1	3.44781	9.75529
169561_i_at	niban protein	3.44666	0
101882_s_at	procollagen, type XVIII, alpha 1	3.44662	7.74265
162588_i_at	spermatogenic Zip 1	3.44566	7.4623
163871_at	SMC2 structural maintenance of chromosomes 2-like 1 (yeast)	3.44129	8.82849
96767_at	membrane bound C2 domain containing protein	3.44102	8.47223
94515_at	sulfide quinone reductase-like (yeast)	3.43554	5.78538
93320_at	carnitine palmitoyltransferase 1, liver	3.43482	13.2212
112032_at	RIKEN cDNA 4933421H10 gene	3.43138	6.91624
93077_s_at	lymphocyte antigen 6 complex, locus C	3.42752	11.2724
111886_at	RIKEN cDNA 9530058O11 gene	3.42108	5.75368
104837_at	RIKEN cDNA 2010005O13 gene	3.42059	6.95292
165901_f_at	RIKEN cDNA 1700015G11 gene	3.41555	7.7218
165197_f_at	keratinocyte associated protein 2	3.41403	10.1898
93437_f_at	Mus musculus, clone IMAGE:3492506, mRNA, partial cds	3.40658	5.85438
160622_at	similar to CG1358 gene product	3.40638	9.85891
111273_at	type 1 tumor necrosis factor receptor shedding aminopeptidase regulator	3.40579	9.98919
110124_at	DEAD (Asp-Glu-Ala-Asp) box polypeptide 58	3.40161	4.44687
111244_at	sorbin and SH3 domain containing 1	3.40097	10.0373
116460_at	expressed sequence AI256711	3.39785	1.71415
108257_at	Transcribed sequences	3.3919	10.1875
112337_at	transmembrane protein 16F	3.39171	5.10761
111597_at	metastasis suppressor 1	3.39015	9.57787
100089_at	peptidylprolyl isomerase C	3.36855	2.20353
111225_at	double cortin and calcium/calmodulin-dependent protein kinase-like 1	3.36684	9.54209
163477_at	RIKEN cDNA 2510048K03 gene	3.36673	7.50711
103894_at	Sh3kbp1 binding protein 1	3.36062	13.4071
110967_at	DNA segment, Chr 13, ERATO Doi 787, expressed	3.35889	7.98177
167557_i_at	potassium inwardly-rectifying channel, subfamily J, member 14	3.35717	17.0422
93364_at	catenin alpha 1	3.35625	11.966
103335_at	lectin, galactose binding, soluble 9	3.35371	14.7119
138544_at	ATPase, Class VI, type 11B	3.35166	16.7294
162104_f_at	TAP binding protein	3.34909	5.74741
163675_r_at	nuclear receptor subfamily 4, group A, member 2	3.34213	10.7628
93042_at	benzodiazepine receptor, peripheral	3.33618	11.9849
100449_g_at	activin A receptor, type II-like 1	3.3354	12.1543
93480_at	RIKEN cDNA 2210021K23 gene	3.33224	9.0549
101548_at	synaptojanin 2 binding protein	3.33128	14.2446
165576_i_at	RIKEN cDNA 2610510J17 gene	3.32854	0.416326
167883_at	Rab acceptor 1 (prenylated)	3.32806	3.27212
111981_at	beta-site APP-cleaving enzyme 2	3.32156	6.7888
96736_at	expressed sequence C79715	3.31896	4.9841
98137_at	carbonic anhydrase 5a, mitochondrial	3.31527	9.72525
93615_at	pre B-cell leukemia transcription factor 3	3.31403	9.92702
102767_at	EST AA536815	3.31277	12.4131
94132_at	Cluster Incl X03920:M.musculus GSHPx gene /cds=(37,642) /gb=X03920 /gi=51123 /ug=Mm.1090 /len=923	3.3107	11.5514
99911_at	sema domain, transmembrane domain (TM), and cytoplasmic domain, (semaphorin) 6B	3.30929	14.6616
103491_at	Mus musculus, clone MGC:32500 IMAGE:5055436, mRNA, complete cds	3.30847	12.6317
109701_at	helicase, lymphoid specific	3.30755	8.40935
104149_at	nuclear factor of kappa light chain gene enhancer in B-cells inhibitor, alpha	3.30684	11.6096
131254_at	FYVE, RhoGEF and PH domain containing 6	3.30524	1.42586
160655_at	carboxypeptidase D	3.30366	0.778685
111383_at	BTB (POZ) domain containing 3	3.30343	9.73999
164383_f_at	E26 avian leukemia oncogene 2, 3' domain	3.2992	7.57423
113750_at	RAB32, member RAS oncogene family	3.29595	10.403
94192_at	ganglioside-induced differentiation-associated-protein 10	3.2858	10.4649
113865_at	Transcribed sequence with strong similarity to protein sp:P00722 (E. coli) BGAL_ECOLI Beta-galactosidase	3.28002	8.1797
161473_f_at	RIKEN cDNA 0610037B21 gene	3.27535	6.65855
100515_at	proprotein convertase subtilisin/kexin type 3	3.274	12.9828
109144_at	formin-like 3	3.27298	5.42892
163674_at	cancer related gene-liver 1	3.27284	4.02788
96752_at	intercellular adhesion molecule	3.27021	13.8157
92773_at	immediate early response 5	3.26801	14.6505
93874_s_at	interleukin 11 receptor, alpha chain 2	3.26196	14.1003
106597_at	gem (nuclear organelle) associated protein 7	3.25785	4.67357
95978_at	ESTs, Weakly similar to ATY1_MOUSE Probable cation-transporting ATPase 1 [M.musulus]	3.25725	4.92453
170902_r_at	death-associated protein	3.25661	13.5987
94834_at	cathepsin H	3.25371	8.79828
96115_at	deleted in polyposis 1	3.25298	13.2431
114679_at	downstream of tyrosine kinase 4	3.24649	8.46236
104578_f_at	actinin, alpha 1	3.24632	9.00609
105212_at	expressed sequence AI317223	3.24458	0.363015
117074_at	RIKEN cDNA A930008K15 gene	3.24422	9.23282
107597_f_at	centromere autoantigen H	3.24186	10.2959
137713_at	RIKEN cDNA 9430025M21 gene	3.23952	16.2617
94256_at	chloride intracellular channel 4 (mitochondrial)	3.23787	5.92764
113302_at	RIKEN cDNA A430056A10 gene	3.23549	8.97564
106997_at	carboxypeptidase D	3.22564	10.4525
160280_at	caveolin, caveolae protein, 22 kDa	3.22485	13.7104
100616_at	centromere autoantigen A	3.2189	12.1133
100709_at	trophoblast specific protein alpha	3.21576	14.1351
95417_at	hypothetical protein MGC37173	3.21546	14.7114
162738_at	transferrin receptor	3.21438	3.51329
116458_s_at	expressed sequence AI256711	3.21162	8.31531
138065_at	expressed sequence AI848122	3.21161	10.7129
131455_at	poly A binding protein, cytoplasmic 1	3.21149	16.3588
160604_at	forkhead box C1	3.20949	8.88616
94394_at	Harvey rat sarcoma oncogene, subgroup R	3.20672	12.1192
95465_s_at	protein distantly related to to the gamma subunit family	3.1998	2.15603
104852_at	integrin alpha 4	3.19513	10.2444
106256_at	cell division cycle associated 1	3.19106	1.15629
166020_f_at	RIKEN cDNA 2410039E07 gene	3.1904	11.6049
160069_at	geminin	3.19027	14.6792
95753_at	hypothetical protein MGC38424	3.18957	8.85215
116731_at	Similar to hemicentin; fibulin 6 (LOC240793), mRNA	3.18883	2.21637
161329_f_at	Cluster Incl AV107153:AV107153 Mus musculus cDNA /clone=2510029O03 /clone_end=3' /gb=AV107153 /gi=5254701 /ug=Mm.58401 /len=209 /NOTE=replacement for probe set(s) 94591_r_at on MG-U74A	3.18559	2.45582
106153_g_at	RIKEN cDNA 4930488L10 gene	3.18453	7.08476
164546_i_at	monocyte to macrophage differentiation-associated	3.17993	6.04044
166694_at	MRNA similar to DKFZP566O1646 protein (cDNA clone MGC:27788 IMAGE:3156934), complete cds	3.17461	12.8524
166330_i_at	developmentally regulated GTP binding protein 1	3.17208	16.1609
162460_f_at	immunoglobulin (CD79A) binding protein 1	3.16292	12.2275
171097_at	AV045674:AV045674 Mus musculus cDNA /clone=1700047P10 /clone_end=3' /gb=AV045674 /gi=4865339 /ug=Mm.47134 /len=296 /NOTE=replacement for probe set(s) 138605_at on MG-U74C	3.16044	16.6334
162142_f_at	proline-rich Gla (G-carboxyglutamic acid) polypeptide 2	3.15884	13.651
100508_at	manic fringe homolog (Drosophila)	3.15245	12.8025
93821_at	DNA segment, Chr 8, ERATO Doi 594, expressed	3.14902	12.9839
97374_at	RIKEN cDNA 2810025M15 gene	3.14592	14.2643
98962_at	lipase, hepatic	3.14112	12.6773
163087_at	serum/glucocorticoid regulated kinase 3	3.13942	10.3583
95654_at	chloride intracellular channel 1	3.12945	5.86109
162808_at	caveolin 2	3.12941	10.2934
162967_r_at	translocation protein 1	3.12569	9.7459
107543_s_at	RIKEN cDNA 2610510D14 gene	3.12113	10.0458
116363_at	expressed sequence AI852640	3.11952	7.44741
162661_at	ubinuclein 1	3.11937	9.82943
107926_at	ets variant gene 6 (TEL oncogene)	3.11061	0
105879_at	cDNA sequence BC053701	3.10399	9.12718
100136_at	lysosomal membrane glycoprotein 2	3.10286	12.8756
165467_r_at	RIKEN cDNA C330016O10 gene	3.09929	2.89609
101112_g_at	ras homolog gene family, member A2	3.09631	12.8993
100633_at	RIKEN cDNA 2810484M10 gene	3.09193	12.2808
107598_at	expressed sequence AA691260	3.08753	9.74952
92625_at	expressed in non-metastatic cells 2, protein (NM23B) (nucleoside diphosphate kinase)	3.08526	0.808498
130610_at	RIKEN cDNA F730047E07 gene	3.07865	3.64876
161000_i_at	expressed sequence AW547774	3.07542	9.15896
137231_r_at	AU042879:AU042879 Mus musculus cDNA, 3' end /clone=J1033C10 /clone_end=3' /gb=AU042879 /gi=3957114 /ug=Mm.42604 /len=588	3.07523	7.96301
112807_at	glucosaminyl (N-acetyl) transferase 1, core 2	3.07009	8.52594
95618_at	expressed sequence C75969	3.0674	0
115913_at	tropomodulin 3	3.0648	6.47247
101886_f_at	histocompatibility 2, D region locus 1	3.06291	14.2552
115029_at	E2F transcription factor 7	3.06197	0.598352
96319_at	cell division cycle 20 homolog (S. cerevisiae)	3.05987	0
164866_f_at	SH2 domain containing 3C	3.0461	9.89013
97095_at	expressed sequence C80208	3.0438	4.40372
167521_f_at	AV026213:AV026213 Mus musculus cDNA /clone=1200018O13 /clone_end=3' /gb=AV026213 /gi=4803205 /ug=Mm.66065 /len=255 /NOTE=replacement for probe set(s) 140743_f_at, 140744_r_at on MG-U74C	3.0434	2.71993
98508_s_at	phosphatidic acid phosphatase 2a	3.03657	12.9371
104833_at	formin binding protein 2	3.03528	7.57887
101520_at	RIKEN cDNA 1700062C23 gene	3.03357	14.3265
111233_at	protein kinase C, eta	3.02856	1.85497
137521_at	Cdc42 GTPase-activating protein	3.02816	16.2883
100128_at	cell division cycle 2 homolog A (S. pombe)	3.02725	0
92850_at	ribosome binding protein 1	3.02673	13.7672
167757_f_at	inter-alpha (globulin) inhibitor H5	3.02544	10.0854
97974_at	zinc finger protein, multitype 1	3.02414	13.6216
115692_r_at	CD2-associated protein	3.02078	7.42705
110777_at	expressed sequence AW049765	3.01565	9.08169
105226_at	Adult retina cDNA, RIKEN full-length enriched library, clone:A930013N02 product:hypothetical protein, full insert sequence	3.01541	6.21241
102399_at	RNA binding protein gene with multiple splicing	3.01395	10.4503
163718_at	RIKEN cDNA 2610029K21 gene	3.01123	10.4773
161001_at	expressed sequence AA407270	3.00904	6.01654
109832_f_at	AW049817:UI-M-BH1-anr-a-02-0-UI.s1 Mus musculus cDNA, 3' end /clone=UI-M-BH1-anr-a-02-0-UI /clone_end=3' /gb=AW049817 /gi=5910346 /ug=Mm.44982 /len=331	3.00717	10.2275
161064_f_at	PHD finger protein 7	3.0001	5.03731
99578_at	topoisomerase (DNA) II alpha	2.99382	13.3467
114665_at	Transcribed sequences	2.99054	8.11598
100013_at	RIKEN cDNA 2010008K16 gene	2.98749	4.58723
106199_at	RIKEN cDNA B230342M21 gene	2.98608	7.46313
100154_at	TAP binding protein	2.98495	10.909
161077_f_at	SWI/SNF related, matrix associated, actin dependent regulator of chromatin, subfamily d, member 2	2.98113	11.4922
102649_s_at	retinoic acid early transcript gamma	2.98096	12.5619
101437_at	serine/threonine kinase 2	2.98009	7.40002
162298_r_at	Cluster Incl AV023208:AV023208 Mus musculus cDNA /clone=1190031H19 /clone_end=3' /gb=AV023208 /gi=4800200 /ug=Mm.46892 /len=202 /NOTE=replacement for probe set(s) 102173_r_at on MG-U74A	2.97819	7.65095
104601_at	thrombomodulin	2.97674	10.8941
140480_f_at	N-methylpurine-DNA glycosylase	2.97171	9.20287
115525_at	Transcribed sequence with weak similarity to protein ref:NP_003478.1 (H.sapiens) TATA box binding protein	2.96372	6.52839
103539_at	cytoplasmic tyrosine kinase, Dscr28C related (Drosophila)	2.96326	0
166952_i_at	RIKEN cDNA 2010003K10 gene	2.96186	12.9155
160774_at	ectonucleoside triphosphate diphosphohydrolase 1	2.95925	13.704
92210_at	angiopoietin 2	2.95923	2.94531
106596_at	Cdc42 GTPase-activating protein	2.95714	7.1825
160872_f_at	RIKEN cDNA 2310008H09 gene	2.95263	5.87622
160104_at	expressed sequence AI195443	2.94982	11.0111
169933_at	EGF-like domain 7	2.9498	0
95531_at	expressed sequence C81439	2.93568	10.067
100533_s_at	cAMP responsive element modulator	2.92621	11.5676
104097_at	budding uninhibited by benzimidazoles 1 homolog (S. cerevisiae)	2.92542	13.8736
103863_at	RIKEN cDNA 5630401J11 gene	2.92118	7.83494
115089_at	Rap guanine nucleotide exchange factor (GEF) 5	2.91718	6.30107
162592_at	tangerin	2.91673	9.35031
132418_at	RIKEN cDNA 4632434I11 gene	2.91467	8.06289
117041_at	EH-domain containing 2	2.9139	8.60776
103203_f_at	expressed sequence AA410048	2.91368	13.7751
117272_at	RIKEN cDNA 2810423G08 gene	2.91225	8.04744
111631_at	RIKEN cDNA 6720456H20 gene	2.90917	8.04012
161480_i_at	ribosomal protein, large, P1	2.90906	4.52353
109120_at	RIKEN cDNA 1300014I06 gene	2.90678	8.67921
162269_at	RIKEN cDNA 1110020E07 gene	2.90193	12.8178
99034_at	Iroquois related homeobox 3 (Drosophila)	2.90173	14.2524
102203_at	placental protein 11 related	2.90129	11.5591
167265_at	expressed sequence C79407	2.89935	4.67724
93728_at	transforming growth factor beta 1 induced transcript 4	2.89582	13.1118
106135_at	desmuslin	2.89469	10.1569
115899_at	RIKEN cDNA A330049M08 gene	2.89327	6.95521
162869_at	ectodermal-neural cortex 1	2.89258	2.83881
137184_at	AI838331:UI-M-AO0-aby-g-05-0-UI.s1 Mus musculus cDNA, 3' end /clone=UI-M-AO0-aby-g-05-0-UI /clone_end=3' /gb=AI838331 /gi=5472544 /ug=Mm.42430 /len=462	2.89246	14.182
112929_at	G protein-coupled receptor 124	2.89151	6.24363
113465_at	expressed sequence AU021025	2.89114	8.77076
103100_at	Mus musculus, clone IMAGE:5011849, mRNA	2.89108	4.04976
164944_f_at	serine hydrolase-like	2.89069	10.8589
164749_f_at	AV154443:AV154443 Mus musculus cDNA /clone=2900062H12 /clone_end=3' /gb=AV154443 /gi=5370544 /ug=Mm.70670 /len=296 /NOTE=replacement for probe set(s) 107196_f_at on MG-U74B	2.88667	5.37792
131186_at	RIKEN cDNA 5430400N05 gene	2.88475	11.7619
130928_s_at	leucine-rich repeat kinase 1	2.88347	16.23
163537_at	membrane associated guanylate kinase interacting protein-like 1	2.88334	9.92301
96978_at	synaptotagmin-like 4	2.88059	9.25376
96784_at	RIKEN cDNA 1110037A17 gene	2.872	0
160257_at	FK506 binding protein 1a (12 kDa)	2.87123	7.178
103201_at	Ttk protein kinase	2.87113	5.28775
165397_f_at	calpain, small subunit 1	2.87067	10.5363
168546_r_at	lamin B1	2.87064	5.52468
113772_at	RIKEN cDNA 4432416J03 gene	2.87055	5.00446
160171_f_at	acyl-Coenzyme A thioesterase 2, mitochondrial	2.86729	13.7529
97550_at	histone deacetylase 7A	2.86676	11.0405
109165_at	budding uninhibited by benzimidazoles 1 homolog, beta (S. cerevisiae)	2.86303	4.72504
101516_at	CD59a antigen	2.85829	12.204
92563_at	leucine rich repeat (in FLII) interacting protein 1	2.85807	2.85313
100124_r_at	integrin beta 1 (fibronectin receptor beta)	2.85513	13.893
109795_at	transforming, acidic coiled-coil containing protein 3	2.85314	10.4958
106188_at	RIKEN cDNA B230317C12 gene	2.8531	10.3894
160476_f_at	ribosomal protein L18	2.85249	7.06289
114478_at	tripartite motif protein 16	2.84843	9.49369
133469_at	Transcribed sequence with weak similarity to protein ref:NP_062687.1 (M.musculus) ras association	2.84352	0.0667543
105788_at	DNA segment, Chr 6, ERATO Doi 538, expressed	2.84345	10.5955
97973_at	T-cell acute lymphocytic leukemia 1	2.8432	5.83378
103545_at	ESTs	2.84306	8.72767
114789_at	RIKEN cDNA 2610311M19 gene	2.84154	8.29354
163627_f_at	collagen triple helix repeat containing 1	2.8385	9.69879
164750_f_at	ras homolog gene family, member G	2.83623	7.27377
104786_at	expressed sequence AI503564	2.83596	6.23789
96516_at	formin binding protein 2	2.83596	10.6142
168641_at	RIKEN cDNA 3110006E14 gene	2.83591	12.4394
92510_at	jagged 2	2.83458	2.29902
104603_at	glutathione S-transferase, theta 2	2.83325	11.1511
92653_at	expressed sequence C79576	2.83239	3.85335
167092_f_at	RIKEN cDNA 1810048P08 gene	2.83141	7.92304
162660_at	RIKEN cDNA 4931406P16 gene	2.83101	5.27984
104634_at	LIM and senescent cell antigen-like domains 1-like	2.82962	10.4607
129130_at	expressed sequence AA960008	2.82938	11.9718
93500_at	aminolevulinic acid synthase 1	2.828	11.8916
100450_r_at	activin A receptor, type II-like 1	2.82657	14.5786
167923_at	RIKEN cDNA 1200015N20 gene	2.82629	0
163418_at	Transcribed sequences	2.82626	10.183
117277_at	RIKEN cDNA 2610027C15 gene	2.82582	6.6582
166238_r_at	Clone IMAGE:4504649, mRNA	2.82559	16.8495
101521_at	baculoviral IAP repeat-containing 5	2.82399	13.411
164074_at	Transcribed sequence with moderate similarity to protein pir:T00261 (H.sapiens) T00261 hypothetical protein KIAA0603 - human	2.8233	6.1604
115966_at	RIKEN cDNA E430016F16 gene	2.82255	6.13
116908_at	SEC63-like (S. cerevisiae)	2.82119	5.97591
98409_at	myosin IB	2.81858	14.6442
102099_f_at	RIKEN cDNA 2900008M13 gene	2.8178	7.02704
104573_at	RIKEN cDNA 4833422P03 gene	2.81618	9.19143
163158_at	SH3 domain protein 1B	2.81521	3.2037
160159_at	cyclin B1, related sequence 1	2.8139	12.6911
100610_at	calpain, small subunit 1	2.81162	14.8047
162401_f_at	RIKEN cDNA 1300017C10 gene	2.80812	14.2641
112092_at	claudin 22	2.80443	7.8821
103444_at	Mus musculus, clone IMAGE:5035239, mRNA, partial cds	2.80346	13.315
96945_at	synaptosomal-associated protein, 23kD	2.8002	13.1891
92310_at	serum-inducible kinase	2.79613	14.2917
94931_at	RIKEN cDNA 1810045K17 gene	2.7929	10.1248
110032_at	SH3 domain protein 1B	2.78561	9.58837
163646_at	junction adhesion molecule 2	2.78464	1.16779
129180_f_at	AW214234:uo45b05.x2 Mus musculus cDNA, 3' end /clone=IMAGE-2645457 /clone_end=3' /gb=AW214234 /gi=6520687 /ug=Mm.22935 /len=293	2.78433	7.9207
163282_at	RIKEN cDNA 3110048G13 gene	2.78344	10.5264
111065_at	serine palmitoyltransferase, long chain base subunit 2	2.7798	8.95644
130720_at	Transcribed sequences	2.77876	2.30346
162796_at	frizzled homolog 1 (Drosophila)	2.77844	4.28038
96206_at	hypothetical protein MGC32394	2.77366	1.10358
92572_at	tumor necrosis factor, alpha-induced protein 1 (endothelial)	2.77099	6.34425
129335_at	Transcribed sequence with strong similarity to protein sp:P00722 (E. coli) BGAL_ECOLI Beta-galactosidase	2.76509	10.645
111630_at	Transcribed sequences	2.76375	0
115923_f_at	cadherin 13	2.76157	0
165578_at	RIKEN cDNA 2300006M17 gene	2.76124	4.0213
107442_at	thioredoxin-like 1	2.76072	7.21716
103456_at	expressed sequence AW322500	2.76038	3.55177
106044_at	RIKEN cDNA D630014A15 gene	2.75848	10.2373
115629_at	RIKEN cDNA 1110003F05 gene	2.75647	6.16024
113870_at	Adult male cecum cDNA, RIKEN full-length enriched library, clone:9130233I07 product:unknown EST, full insert sequence	2.75178	10.5438
98019_at	transforming growth factor beta 1 induced transcript 1	2.75148	9.36477
169880_s_at	plasmacytoma variant translocation 1	2.74779	7.13428
98924_at	RIKEN cDNA 4930569O04 gene	2.74442	12.7807
92539_at	S100 calcium binding protein A10 (calpactin)	2.74419	14.4466
140220_r_at	hypothetical protein 6720430O15	2.74174	16.846
164910_s_at	dopachrome tautomerase	2.74164	8.66302
104179_at	expressed sequence AI788669	2.73751	12.7417
103225_at	RIKEN cDNA 2310005K03 gene	2.73739	13.8579
130186_f_at	T-cell, immune regulator 1	2.73709	8.65315
97268_i_at	RIKEN cDNA 0610010I12 gene	2.73638	11.9249
135552_f_at	AI646499:vv52g01.x1 Mus musculus cDNA, 3' end /clone=IMAGE-1226064 /clone_end=3' /gb=AI646499 /gi=4724974 /ug=Mm.97168 /len=319	2.73375	7.57481
107490_at	potassium channel tetramerisation domain containing 13	2.73042	9.56578
93826_at	hypothetical protein MGC38798	2.72887	13.4217
136561_f_at	AI481141:vg85f05.x1 Mus musculus cDNA, 3' end /clone=IMAGE-872769 /clone_end=3' /gb=AI481141 /gi=4374367 /ug=Mm.35741 /len=401	2.72882	12.2649
160264_s_at	RIKEN cDNA 1500036F01 gene	2.72782	14.8505
106015_at	cDNA sequence BC008163	2.72756	9.68196
163453_at	RIKEN cDNA 4930547N16 gene	2.72628	8.84811
163180_at	neuropathy target esterase	2.72574	7.383
163350_at	RIKEN cDNA 1110014L14 gene	2.72044	7.43941
96605_at	RIKEN cDNA 0610011I04 gene	2.71559	0.297694
163797_i_at	DEP domain containing 1	2.71482	10.2686
112010_at	platelet derived growth factor, B polypeptide	2.70718	8.67122
165105_f_at	guanine nucleotide binding protein (G protein), gamma 12	2.70693	7.7334
161172_f_at	hypothetical protein MGC38424	2.70272	7.45206
135132_at	chemokine binding protein 2	2.70087	10.2968
97106_at	mitogen activated protein kinase kinase kinase 8	2.6971	12.3374
92277_at	RIKEN cDNA 9130023P14 gene	2.69652	11.4274
170702_at	eukaryotic translation termination factor 1	2.69201	7.55356
160973_at	expressed sequence AA408511	2.69132	10.7699
113336_at	inositol 1,4,5-triphosphate receptor 5	2.68987	6.3142
165205_r_at	BRCA1 associated protein	2.68773	7.0485
115943_at	Transcribed sequences	2.68573	5.94005
160526_s_at	cAMP responsive element modulator	2.68121	13.447
162649_at	CDC42 effector protein (Rho GTPase binding) 3	2.68073	9.6196
112321_at	ELL associated factor 1	2.679	7.41479
99089_at	myelin and lymphocyte protein, T-cell differentiation protein	2.67891	10.0043
92854_at	RAB11a, member RAS oncogene family	2.67837	9.17031
129661_at	RIKEN cDNA B430206E18 gene	2.67616	1.24612
104701_at	basic helix-loop-helix domain containing, class B2	2.67527	14.5998
102983_at	MAD homolog 1 (Drosophila)	2.67405	12.0651
166940_r_at	lysosomal-associated membrane protein 3	2.6738	11.1278
99931_at	laminin, alpha 5	2.67325	8.68942
101486_at	proteasome (prosome, macropain) subunit, beta type 10	2.66906	12.7549
116956_at	potassium channel tetramerisation domain containing 12	2.66545	9.75356
110472_f_at	RIKEN cDNA D330024H06 gene	2.66436	10.6301
116451_at	retinoic acid receptor responder (tazarotene induced) 1	2.66349	9.80713
108805_f_at	ADP-ribosylation factor-like 4	2.66257	10.1707
114138_at	glycerol phosphate dehydrogenase 2, mitochondrial	2.65943	10.0277
167549_f_at	calponin homology (CH) domain containing 1	2.65437	2.07416
96536_at	ESTs, Moderately similar to S12207 hypothetical protein (B2 element) - mouse [M.musulus]	2.65325	5.53139
107591_at	ras homolog gene family, member J	2.65241	5.76414
107502_at	cDNA sequence BC037674	2.65109	8.54422
115926_at	RIKEN cDNA 5133401H06 gene	2.65091	9.96384
101000_at	ornithine decarboxylase antizyme 2	2.64582	11.0987
111006_at	phospholipase C, beta 1	2.64254	9.33873
110672_at	macrophage galactose N-acetyl-galactosamine specific lectin 1	2.64152	6.16299
129329_r_at	Transcribed sequence with strong similarity to protein sp:P00722 (E. coli) BGAL_ECOLI Beta-galactosidase	2.64065	16.5722
137348_at	hypothetical protein B830032F12	2.63937	14.327
103728_at	ESTs	2.63866	3.58946
102960_at	recombination activating gene 1 gene activation	2.63719	14.2222
103292_at	stanniocalcin	2.63674	14.2658
163109_at	longevity assurance homolog 5 (S. cerevisiae)	2.63433	5.38646
113995_at	myelin protein zero-like 1	2.63377	9.12766
98141_at	REV1-like (S. cerevisiae)	2.63353	14.6086
96122_at	RIKEN cDNA 2310016A09 gene	2.63174	14.1732
163203_at	protein phosphatase 1, regulatory (inhibitor) subunit 12A	2.6316	10.0244
167113_at	RIKEN cDNA 8030497I03 gene	2.63139	8.01844
137230_f_at	AU042879:AU042879 Mus musculus cDNA, 3' end /clone=J1033C10 /clone_end=3' /gb=AU042879 /gi=3957114 /ug=Mm.42604 /len=588	2.62895	0
94331_at	signal transducer and activator of transcription 6	2.62868	10.8274
163846_at	CD38 antigen	2.62835	4.67751
167894_f_at	lectin, galactose binding, soluble 8	2.62767	13.1334
113753_at	StAR-related lipid transfer (START) domain containing 4	2.62248	10.4011
114490_at	soc-2 (suppressor of clear) homolog (C. elegans)	2.62104	10.7519
168910_at	RIKEN cDNA 1110033K02 gene	2.62088	16.924
108011_at	RIKEN cDNA 1110001A12 gene	2.61376	3.78343
163880_at	uveal autoantigen with coiled-coil domains and ankyrin repeats	2.61322	9.14753
102109_at	ribosomal protein L13	2.61286	11.9662
96962_at	ribosomal protein L6	2.60639	12.483
113752_at	RIKEN cDNA 4833438C02 gene	2.60542	6.95716
162228_f_at	START domain containing 3	2.60259	12.6129
138179_at	RIKEN cDNA C630007B19 gene	2.60236	13.6417
103821_at	cell division cycle 6 homolog (S. cerevisiae)	2.60119	14.0715
109982_at	fos-like antigen 2	2.59993	10.5756
160261_i_at	expressed sequence AW228608	2.59861	12.7826
160543_at	sorting nexin 3	2.59806	8.59622
103693_at	expressed sequence AA407980	2.58862	12.7068
130969_at	abhydrolase domain containing 2	2.58728	2.31894
115110_at	early B-cell factor 1	2.58699	10.211
136149_at	RIKEN cDNA E430036I04 gene	2.58565	1.57228
132224_at	AI121178:ud70d02.x1 Mus musculus cDNA, 3' end /clone=IMAGE-1451235 /clone_end=3' /gb=AI121178 /gi=3521502 /ug=Mm.95648 /len=467	2.58453	16.0546
103255_at	Tnf receptor-associated factor 5	2.58433	13.7865
162780_at	forkhead box O1	2.58399	8.86601
162414_f_at	FK506 binding protein 10 (65 kDa)	2.58163	10.5043
160312_at	RIKEN cDNA 2810051A14 gene	2.57959	5.79745
135141_at	Transcribed sequences	2.57675	8.36561
133842_at	jagged 1	2.5766	11.6683
114629_at	rho/rac guanine nucleotide exchange factor (GEF) 2	2.57543	8.96928
167148_f_at	S100 calcium binding protein A16	2.57532	13.3906
98432_at	paladin	2.57436	1.43525
110710_at	immune associated nucleotide 4	2.57356	8.34177
102209_at	nuclear factor of activated T-cells, cytoplasmic 1	2.57282	4.34675
162531_at	BMP and activin membrane-bound inhibitor, homolog (Xenopus laevis)	2.5699	9.14419
116903_at	RIKEN cDNA 9630037P07 gene	2.56958	3.90423
109813_f_at	G protein-coupled receptor kinase-interactor 2	2.56087	10.503
140477_f_at	Adult male epididymis cDNA, RIKEN full-length enriched library, clone:9230109L20 product:unclassifiable, full insert sequence	2.55988	0
110331_at	RIKEN cDNA 6330505F04 gene	2.55823	6.41655
99191_at	CREBBP/EP300 inhibitory protein 1	2.55629	13.9636
169260_i_at	Fanconi anemia, complementation group L	2.55523	14.5426
104252_at	expressed sequence AU020206	2.55212	4.82419
136673_at	RIKEN cDNA A830021K08 gene	2.55163	7.069
103035_at	transporter 1, ATP-binding cassette, sub-family B (MDR/TAP)	2.5515	5.39282
110092_at	desmuslin	2.55104	9.17963
108710_at	G protein-coupled receptor kinase-interactor 2	2.54547	8.64328
98513_at	G protein beta subunit-like	2.53599	3.05001
161655_at	defender against cell death 1	2.53493	8.82175
95156_g_at	zinc ring finger protein 1	2.53413	0.197937
93067_f_at	histone gene complex 2	2.53299	6.11906
164519_i_at	RIKEN cDNA 9430008C03 gene	2.53242	8.41084
100584_at	annexin A4	2.53223	12.4203
93495_at	peroxiredoxin 4	2.52996	14.4229
112245_at	RIKEN cDNA 9430025M21 gene	2.52958	9.59826
162347_f_at	biglycan	2.52782	13.7
104382_at	mast cell protease 4	2.52634	14.0647
115700_at	solute carrier family 16 (monocarboxylic acid transporters), member 9	2.52413	5.95937
160387_at	RIKEN cDNA 1110055L24 gene	2.52202	4.81876
97383_at	expressed sequence C80501	2.52065	10.2231
104297_at	RIKEN cDNA 2510001A17 gene	2.51529	13.9596
97349_at	RIKEN cDNA 2610019M19 gene	2.51373	7.58235
134281_at	phosphodiesterase 7B	2.51364	13.4585
134001_at	AI507522:vl53e05.x1 Mus musculus cDNA, 3' end /clone=IMAGE-975968 /clone_end=3' /gb=AI507522 /gi=4405373 /ug=Mm.33675 /len=337	2.51286	17.2935
98533_at	cytochrome b-5	2.51241	1.58237
104743_at	cadherin 13	2.51241	11.7386
115028_at	RIKEN cDNA 2410043F08 gene	2.50944	1.54044
100727_at	ribosomal protein L28	2.50888	1.82245
139392_at	AI593333:vu21c08.x1 Mus musculus cDNA, 3' end /clone=IMAGE-1181294 /clone_end=3' /gb=AI593333 /gi=4602381 /ug=Mm.49531 /len=429	2.50688	8.66704
96786_s_at	RIKEN cDNA 0610013D04 gene	2.50686	7.43651
165667_r_at	transporter 2, ATP-binding cassette, sub-family B (MDR/TAP)	2.50595	11.9149
109722_at	expressed sequence AI265725	2.5045	9.77632
170844_i_at	leptin receptor	2.50397	15.7032
100958_at	EST C79050	2.50276	12.1917
101877_at	Mus musculus, RIKEN cDNA 4930445G01 gene, clone MGC:28108 IMAGE:3968084, mRNA, complete cds	2.50205	14.0761
164433_at	AV353623:AV353623 Mus musculus cDNA, 3' end /clone=7120410I18 /clone_end=3' /gb=AV353623 /gi=6394680 /ug=Mm.86225 /len=247 /NOTE=replacement for probe set(s) 112635_f_at on MG-U74B	2.50123	10.0596
93459_s_at	frizzled homolog 4 (Drosophila)	2.49914	11.7081
117144_r_at	v-maf musculoaponeurotic fibrosarcoma oncogene family, protein B (avian)	2.49617	9.55115
98951_at	RIKEN cDNA 1100001J13 gene	2.49147	13.6413
113086_at	Transcribed sequences	2.48942	3.80171
103926_at	hypothetical protein MGC37551	2.4887	12.3266
117270_at	RIKEN cDNA 1700022C02 gene	2.4882	6.49844
109482_at	Transcribed sequences	2.48662	6.85115
134302_at	AI553393:vw51g09.x1 Mus musculus cDNA, 3' end /clone=IMAGE-1247392 /clone_end=3' /gb=AI553393 /gi=4485756 /ug=Mm.35314 /len=412	2.48609	11.0621
110663_at	CDC28 protein kinase 1	2.48455	9.33554
110334_at	RIKEN cDNA 9130404D14 gene	2.48362	9.58638
112860_at	RIKEN cDNA 2310066E14 gene	2.48098	2.48007
98973_at	RIKEN cDNA 2610318G08 gene	2.4805	3.44874
108893_at	myocyte enhancer factor 2A	2.48013	8.98403
102370_at	hydroxysteroid (17-beta) dehydrogenase 11	2.47978	14.5886
116175_at	RIKEN cDNA 6720463M24 gene	2.47967	9.22465
130745_at	protein phosphatase 1, regulatory (inhibitor) subunit 13B	2.47693	5.20045
98996_at	serine/threonine kinase 18	2.47625	10.34
110765_at	RIKEN cDNA C530046K17 gene	2.47553	10.3381
114783_at	lactate dehydrogenase D	2.47183	6.28774
171217_f_at	RIKEN cDNA 2900073G15 gene	2.47157	17.1705
94068_at	ribosomal protein S19	2.47132	13.6438
94263_f_at	proteasome (prosome, macropain) subunit, beta type 7	2.46985	14.1654
168088_f_at	sepiapterin reductase	2.46961	11.0036
139237_r_at	Down syndrome critical region gene 1-like 1	2.46583	4.62165
93330_at	aquaporin 1	2.46581	12.3906
170292_at	myosin, light polypeptide 7, regulatory	2.46187	13.2016
101345_at	Cluster Incl AF030001:Mus musculus major histocompatibility locus class III region-butyrophilin-like protein gene, partial cds; Notch4, PBX2, RAGE, lysophatidic acid acyl transferase-alpha, palmitoyl-protein thioesterase 2 (PPT2), CREB-RP, and tenascin X	2.46174	12.9762
92770_at	S100 calcium binding protein A6 (calcyclin)	2.46104	11.2572
115753_at	solute carrier family 22 (organic anion transporter), member 8	2.45898	9.89317
116143_at	zinc finger protein 403	2.45897	7.09708
116470_at	RIKEN cDNA 4932431K08 gene	2.45893	7.94164
114895_at	hypothetical protein C130031J23	2.45548	3.11125
97411_at	ect2 oncogene	2.45488	12.6147
96600_at	expressed sequence C76601	2.45233	3.66415
96004_at	RIKEN cDNA 2210417O06 gene	2.45184	13.8171
99144_s_at	trans-golgi network protein 1	2.45175	9.64488
95117_at	insulin-like growth factor 2 receptor	2.45113	9.4945
106598_at	RIKEN cDNA 4833415N24 gene	2.44688	7.80238
96081_at	thymidine kinase 1	2.44688	10.9713
100151_at	tumor differentially expressed 1	2.44623	7.21771
163952_at	RIKEN cDNA 1300018J18 gene	2.44552	10.7889
160846_at	NIMA (never in mitosis gene a)-related expressed kinase 6	2.44511	0
110071_at	Transcribed sequences	2.44505	8.81621
115408_at	potassium voltage-gated channel, Isk-related subfamily, gene 3	2.44458	7.96921
163234_at	RIKEN cDNA 2810427A07 gene	2.44299	9.82446
116318_at	RIKEN cDNA C730027E14 gene	2.44262	10.7776
112853_at	solute carrier family 39 (zinc transporter), member 10	2.44228	10.0399
100943_at	solute carrier family 1 (glutamate/neutral amino acid transporter), member 4	2.44223	14.0073
113057_at	ubiquitin specific protease 43	2.4405	8.59266
162784_at	Rho GTPase activating protein 17	2.44022	9.301
96772_at	DNA primase, p49 subunit	2.43963	5.10158
94254_at	chloride intracellular channel 4 (mitochondrial)	2.43924	10.8736
116056_at	annexin A7	2.43805	8.91862
164531_f_at	protein kinase inhibitor, gamma	2.43713	10.0906
110715_at	phospholipase D1	2.43478	6.97527
109499_at	RIKEN cDNA 4930565N16 gene	2.43384	3.96308
105342_at	AI119728:uf01b12.x1 Mus musculus cDNA, 3' end /clone=IMAGE-1499327 /clone_end=3' /gb=AI119728 /gi=3520052 /ug=Mm.37394 /len=698	2.43312	5.85123
164295_i_at	RIKEN cDNA B230106I24 gene	2.43231	9.00286
95709_at	DNA segment, Chr 7, Wayne State University 86, expressed	2.43166	13.195
104065_at	ER degradation enhancing alpha mannosidase-like	2.43145	8.65812
111412_at	cDNA sequence BC067047	2.42876	7.57757
97933_at	Mus musculus, clone IMAGE:3589087, mRNA, partial cds	2.4285	7.64566
116004_at	Transcribed sequence with weak similarity to protein ref:NP_079268.1 (H.sapiens) hypothetical protein FLJ12547 [Homo sapiens]	2.41979	7.56302
167340_r_at	nucleoporin like 1	2.419	0
162520_at	tumor necrosis factor, alpha-induced protein 1 (endothelial)	2.41578	1.73311
108846_at	zinc finger protein 52	2.41502	5.14283
103205_at	T-cell, immune regulator 1	2.41425	14.0728
113701_at	zinc finger, DHHC domain containing 8	2.41412	10.0943
92633_at	cathepsin Z	2.41309	13.6648
115717_at	leucine, glutamic acid, lysine family 1 protein	2.41153	8.5123
106649_at	protein phosphatase 1F (PP2C domain containing)	2.41134	1.97083
116498_at	11 days embryo gonad cDNA, RIKEN full-length enriched library, clone:7030415G17 product:unknown EST, full insert sequence	2.41131	10.2668
113736_at	hypothetical protein 5430421B17	2.40988	8.28922
116380_at	importin 11	2.40824	4.99427
112887_at	cDNA sequence BC023814	2.40784	8.04119
161026_s_at	synaptotagmin-like 4	2.40755	12.0773
107566_at	RIKEN cDNA 1810054O13 gene	2.40684	10.7397
103721_at	nephronectin	2.40492	14.333
100923_at	myosin X	2.40448	6.20252
108534_at	caspase recruitment domain 4	2.40255	0.646182
114299_at	Adult male small intestine cDNA, RIKEN full-length enriched library, clone:2010109N14 product:unknown EST, full insert sequence	2.39758	8.40948
94561_at	epithelial protein lost in neoplasm	2.39612	0
140323_r_at	RIKEN cDNA 1110019L22 gene	2.39561	16.5222
104719_at	solute carrier family 12, member 7	2.39309	4.03407
102976_at	breast cancer 1	2.3927	14.1178
162948_s_at	DNA segment, Chr 10, University of California at Los Angeles 1	2.3923	6.59079
161787_f_at	retroviral integration site 1	2.39142	10.532
105060_at	cDNA sequence AF119384	2.38974	5.84606
114989_at	expressed sequence AI987712	2.3893	6.5352
103574_at	expressed sequence AW060987	2.38924	11.9625
116674_at	inter-alpha (globulin) inhibitor H5	2.38907	7.13575
161400_f_at	expressed sequence AU018702	2.38859	10.7354
92793_at	tumor necrosis factor receptor superfamily, member 1a	2.38761	0
164076_at	oxysterol binding protein-like 8	2.38748	9.78328
112372_at	RIKEN cDNA D930036B08 gene	2.38611	9.64882
136143_at	Transcribed sequences	2.38516	16.4267
163075_at	ankyrin repeat and SOCS box-containing protein 4	2.38461	7.37024
107290_at	RIKEN cDNA 1300001I01 gene	2.38355	8.59766
104750_at	interferon gamma inducible protein, 47 kDa	2.38107	13.9153
109522_at	Transcribed sequences	2.38071	9.63485
164929_f_at	MARVEL (membrane-associating) domain containing 1	2.38063	3.80473
101982_at	vasodilator-stimulated phosphoprotein	2.38003	12.6828
102126_at	ribosomal protein S12	2.37955	3.22275
99108_s_at	growth hormone receptor	2.3775	13.2467
107624_at	RIKEN cDNA 2900054P12 gene	2.37718	10.4795
114044_r_at	Transcribed sequence with strong similarity to protein sp:Q9NZJ4 (H.sapiens) SACS_HUMAN Sacsin	2.37711	9.94442
168379_i_at	collectin sub-family member 12	2.37285	13.2245
107592_at	RIKEN cDNA 6330415F13 gene	2.37163	9.29691
168491_at	Rho GTPase activating protein 20	2.37074	17.1949
112705_at	high mobility group 20 B	2.37018	5.91302
103064_at	checkpoint kinase 1 homolog (S. pombe)	2.3685	5.60443
103446_at	RIKEN cDNA 9130009C22 gene	2.36749	13.9421
106438_at	peptidylprolyl isomerase (cyclophilin)-like 4	2.36736	0.384525
110964_at	phosphodiesterase 2A, cGMP-stimulated	2.36549	7.47199
166563_f_at	GA repeat binding protein, beta 1	2.3647	5.59571
109807_f_at	A kinase (PRKA) anchor protein (gravin) 12	2.36196	10.723
105820_at	SH3/ankyrin domain gene 3	2.36114	8.79096
94034_at	small fragment nuclease	2.35975	7.99441
170540_at	AV327759:AV327759 Mus musculus cDNA, 3' end /clone=6330436H09 /clone_end=3' /gb=AV327759 /gi=6367811 /ug=Mm.94435 /len=293 /NOTE=replacement for probe set(s) 132098_at on MG-U74C	2.3557	16.8611
110989_at	expressed sequence AI131754	2.35351	2.65732
135159_at	Transcribed sequences	2.3534	2.77432
94536_s_at	RIKEN cDNA 2900073G15 gene	2.35278	14.0036
135649_at	AI536278:vr05d10.x1 Mus musculus cDNA, 3' end /clone=IMAGE-1110931 /clone_end=3' /gb=AI536278 /gi=4450413 /ug=Mm.33760 /len=234	2.35101	1.74705
117302_at	myeloid/lymphoid or mixed lineage-leukemia translocation to 4 homolog (Drosophila)	2.34892	8.55207
94805_f_at	H2A histone family, member X	2.34884	6.84875
170883_i_at	calpastatin	2.34869	15.5872
97197_r_at	Mus musculus, clone MGC:40664 IMAGE:5132817, mRNA, complete cds	2.34763	12.1552
108789_at	E2F transcription factor 6	2.34512	9.30375
134331_at	Transcribed sequence with weak similarity to protein pir:I38588 (H.sapiens) I38588 reverse transcriptase homolog - human retrotransposon L1	2.34473	16.4832
98615_at	RIKEN cDNA 0610041E09 gene	2.34318	11.9493
105500_at	expressed sequence AI662791	2.34302	8.48574
114548_at	AW047251:UI-M-BH1-amb-h-10-0-UI.s1 Mus musculus cDNA, 3' end /clone=UI-M-BH1-amb-h-10-0-UI /clone_end=3' /gb=AW047251 /gi=5907780 /ug=Mm.24740 /len=415	2.33994	9.94199
101885_at	growth arrest specific 5	2.33982	11.1073
98993_at	protein phosphatase 2, regulatory subunit B (B56), gamma isoform	2.33712	12.143
162569_at	solute carrier family 43, member 1	2.33605	5.42315
111429_f_at	membrane metallo endopeptidase	2.33538	6.16944
115235_at	Transcribed sequences	2.33384	8.38714
164610_f_at	ribosomal protein S5	2.33251	2.43225
133684_at	Transcribed sequences	2.32996	14.812
93063_at	amyloid beta (A4) precursor protein	2.32786	11.3652
104965_at	RIKEN cDNA 2610016C23 gene	2.32574	10.235
108274_at	RIKEN cDNA 3110062M04 gene	2.32446	10.426
107630_at	ring finger protein 126	2.32347	8.17453
95474_at	coagulation factor II (thrombin) receptor	2.32342	11.5535
117096_at	RIKEN cDNA C030033F14 gene	2.32107	10.881
93600_at	leptin receptor	2.32082	10.4035
109494_at	dedicator of cyto-kinesis 1	2.32037	2.28826
164066_at	RAP2B, member of RAS oncogene family	2.31862	7.39344
94255_g_at	chloride intracellular channel 4 (mitochondrial)	2.31807	11.5278
106012_at	RIKEN cDNA 2610005B21 gene	2.31721	0
161702_f_at	laminin, alpha 5	2.31545	5.87682
115398_at	RIKEN cDNA 2310007D03 gene	2.31254	9.85464
166012_at	solute carrier family 38, member 2	2.31225	17.2958
93216_at	fibroblast growth factor 2	2.31189	9.9817
135784_at	Transcribed sequences	2.31174	7.8478
93151_at	copine VI	2.31157	13.819
95869_at	Cluster Incl C78041:C78041 Mus musculus cDNA, 3' end /clone=J0041H05 /clone_end=3' /gb=C78041 /gi=2518371 /ug=Mm.24980 /len=538	2.31128	9.98396
137320_g_at	Transcribed sequences	2.31006	14.1676
95506_at	myosin IC	2.30881	9.73563
106454_at	RIKEN cDNA 9030625G08 gene	2.3084	10.8077
93999_at	small nuclear ribonucleoprotein polypeptide G	2.30696	12.3701
107619_s_at	signal recognition particle 72	2.3059	9.27294
162475_f_at	peptidoglycan recognition protein	2.30493	14.349
105266_at	phosphatidylinositol-4-phosphate 5-kinase, type 1 gamma	2.30489	5.68453
106573_at	SNF related kinase	2.3018	9.95399
131439_r_at	C85856:C85856 Mus musculus cDNA, 3' end /clone=J0215F03 /clone_end=3' /gb=C85856 /gi=2917813 /ug=Mm.95653 /len=580	2.30101	13.3198
165212_i_at	expressed sequence AI427515	2.29738	8.85245
117331_at	LIM and cysteine-rich domains 1	2.29686	6.33286
101464_at	tissue inhibitor of metalloproteinase 1	2.29553	11.0951
113286_at	Transcribed sequence with weak similarity to protein ref:NP_510685.1 (C.elegans) cadherin-type repeat [Caenorhabditis elegans]	2.29472	9.76302
107553_at	protein tyrosine phosphatase-like (proline instead of catalytic arginine), member b	2.29411	10.398
133399_at	Transcribed sequences	2.29285	16.7518
94022_at	RIKEN cDNA 5330430H08 gene	2.2915	5.65914
95698_at	RIKEN cDNA 1110002H15 gene	2.29126	14.7725
93662_s_at	zeta-chain (TCR) associated protein kinase (70kD)	2.29022	12.577
136252_at	AI850230:UI-M-BG1-aie-d-10-0-UI.s1 Mus musculus cDNA, 3' end /clone=UI-M-BG1-aie-d-10-0-UI /clone_end=3' /gb=AI850230 /gi=5494136 /ug=Mm.40199 /len=419	2.28366	15.3077
111683_at	DNA segment, Chr 10, University of California at Los Angeles 1	2.28192	8.15962
171023_at	AV153766:AV153766 Mus musculus cDNA /clone=2900057I15 /clone_end=3' /gb=AV153766 /gi=5358972 /ug=Mm.82281 /len=307 /NOTE=replacement for probe set(s) 132979_at on MG-U74C	2.28103	7.99698
169470_at	AV160981:AV160981 Mus musculus cDNA /clone=3010060L16 /clone_end=3' /gb=AV160981 /gi=5404616 /ug=Mm.65295 /len=322 /NOTE=replacement for probe set(s) 138375_at on MG-U74C	2.27941	16.0094
97425_at	expressed sequence AW547365	2.27925	13.6135
129142_at	Transcribed sequences	2.27776	12.7991
104728_at	protein S (alpha)	2.27632	12.5518
160613_at	lipocalin 7	2.27612	14.7855
168264_i_at	3-phosphoinositide dependent protein kinase-1	2.27479	7.51154
114313_at	RIKEN cDNA 2810482I07 gene	2.2731	9.97104
111772_at	ribosomal protein L6	2.27238	9.16289
103634_at	interferon dependent positive acting transcription factor 3 gamma	2.27198	11.2091
114924_at	RIKEN cDNA 2610301F02 gene	2.26951	8.75539
165295_at	integrin beta 4 binding protein	2.26926	7.08359
95565_at	RIKEN cDNA 0610009D16 gene	2.2684	14.7387
98984_f_at	glycerol phosphate dehydrogenase 1, mitochondrial	2.26778	7.91642
105150_at	Transcribed sequences	2.266	4.97451
163629_at	limb region 1	2.26578	10.7118
136210_at	AI854555:UI-M-BH0-ajj-g-02-0-UI.s1 Mus musculus cDNA, 3' end /clone=UI-M-BH0-ajj-g-02-0-UI /clone_end=3' /gb=AI854555 /gi=5498461 /ug=Mm.39949 /len=395	2.26363	17.2547
106968_at	RIKEN cDNA 2610529C04 gene	2.26353	10.4402
98099_at	nudix (nucleoside diphosphate linked moiety X)-type motif 9	2.26242	10.768
96426_at	Cluster Incl U38967:Prothymosin beta 4 /cds=(0,134) /gb=U38967 /gi=1072099 /ug=Mm.22566 /len=542	2.26176	3.3011
114899_at	3 days neonate thymus cDNA, RIKEN full-length enriched library, clone:A630020E15 product:unknown EST, full insert sequence	2.26149	9.83118
115825_at	cask-interacting protein 2	2.2607	3.56069
162276_i_at	complement component 1, q subcomponent, beta polypeptide	2.25937	11.6934
170919_at	AV092795:AV092795 Mus musculus cDNA /clone=2310075I05 /clone_end=3' /gb=AV092795 /gi=5240343 /ug=Mm.81685 /len=298 /NOTE=replacement for probe set(s) 132856_f_at on MG-U74C	2.25823	14.8342
167525_at	E26 avian leukemia oncogene 1, 5' domain	2.2556	13.1948
98511_at	hnRNP-associated with lethal yellow	2.2524	14.6775
168602_i_at	AV212775:AV212775 Mus musculus cDNA, 3' end /clone=2410118J02 /clone_end=3' /gb=AV212775 /gi=6154376 /ug=Mm.54375 /len=356 /NOTE=replacement for probe set(s) 135996_at on MG-U74C	2.2492	2.64111
96653_at	RIKEN cDNA 0610007O07 gene	2.24886	13.1883
97790_s_at	laminin, alpha 3	2.24827	2.93767
116537_at	LUC7-like 2 (S. cerevisiae)	2.24658	7.88625
170745_i_at	RIKEN cDNA 1110017H11 gene	2.24226	11.6025
168504_r_at	Rab acceptor 1 (prenylated)	2.2412	0
104360_at	archvillin	2.24032	11.6782
108718_at	coatomer protein complex, subunit gamma 2, antisense 2	2.24006	8.17674
105261_at	Transcribed sequences	2.23958	7.30168
97500_g_at	four and a half LIM domains 1	2.23899	4.93585
92488_at	caspase 12	2.23781	1.9194
130608_at	Transcribed sequences	2.23494	9.14368
107299_at	Transcribed sequences	2.2348	6.12495
114150_at	a disintegrin-like and metalloprotease (reprolysin type) with thrombospondin type 1 motif, 4	2.23413	9.82638
107915_at	Adult male small intestine cDNA, RIKEN full-length enriched library, clone:2010016H04 product:unknown EST, full insert sequence	2.23381	9.9693
105924_at	RIKEN cDNA A830059I20 gene	2.23296	7.54303
92763_at	ATP-binding cassette, sub-family B (MDR/TAP), member 7	2.23286	14.0445
105079_at	T-cell activation kelch repeat protein	2.23233	10.4409
106189_at	RIKEN cDNA 2010005O13 gene	2.23208	10.7117
166833_at	neurogranin	2.23136	0.234726
92567_at	procollagen, type V, alpha 2	2.22895	14.1555
133371_i_at	AW210035:ul50b08.y1 Mus musculus cDNA, 5' end /clone=IMAGE-2101719 /clone_end=5' /gb=AW210035 /gi=6515975 /ug=Mm.26024 /len=480	2.22836	13.4372
164991_f_at	AV228145:AV228145 Mus musculus cDNA, 3' end /clone=4432414D09 /clone_end=3' /gb=AV228145 /gi=6180664 /ug=Mm.77248 /len=235 /NOTE=replacement for probe set(s) 108182_f_at on MG-U74B	2.22834	7.37838
98956_at	RIKEN cDNA 1810049E02 gene	2.22799	9.87796
97538_at	beta-glucuronidase	2.22771	12.858
106536_f_at	cytochrome P450, family 2, subfamily c, polypeptide 40	2.22529	9.43718
163609_at	dedicator of cyto-kinesis 1	2.2238	8.88973
111911_at	RIKEN cDNA 9430029K10 gene	2.22355	9.88985
116131_at	Transcribed sequences	2.22342	9.61206
161139_f_at	development and differentiation enhancing	2.22106	0
102696_s_at	phosphotidylinositol transfer protein, beta	2.21969	9.31163
111781_at	exosome component 2	2.21965	4.83146
101869_s_at	hemoglobin, beta adult major chain	2.21807	14.7569
162041_f_at	lymphocyte antigen 64	2.21786	2.43499
163301_at	RIKEN cDNA 7030401O21 gene	2.21708	10.4466
100095_at	scavenger receptor class B, member 1	2.21564	13.774
165228_r_at	Nedd4 family interacting protein 2	2.21561	8.82064
92807_at	thioredoxin 1	2.21423	4.03546
170734_at	adaptor protein with pleckstrin homology and src	2.21352	11.5759
103596_at	diacylglycerol kinase, alpha (80 kDa)	2.21315	13.5611
98327_at	expressed sequence AU015084	2.21301	11.7652
106138_at	natriuretic peptide receptor 3	2.21222	7.73115
162806_at	RIKEN cDNA 2410004H02 gene	2.21129	7.58159
99777_s_at	DNA segment, Chr 4, ERATO Doi 27, expressed	2.21111	7.79675
107041_at	cDNA sequence BC002216	2.21097	10.0177
163531_at	Shc SH2-domain binding protein 1	2.21093	10.6635
93305_f_at	vesicle-associated membrane protein 8	2.2105	14.0801
162576_at	related RAS viral (r-ras) oncogene homolog 2	2.20981	7.24629
160832_at	low density lipoprotein receptor	2.20946	7.02867
137155_f_at	AI839183:UI-M-AO0-ach-h-09-0-UI.s1 Mus musculus cDNA, 3' end /clone=UI-M-AO0-ach-h-09-0-UI /clone_end=3' /gb=AI839183 /gi=5473396 /ug=Mm.42262 /len=308	2.2091	15.2074
93574_at	serine (or cysteine) proteinase inhibitor, clade F), member 1	2.20823	11.2062
95431_at	DNA segment, Chr 16, Wayne State University 109, expressed	2.2075	14.4749
115267_at	eukaryotic elongation factor-2 kinase	2.20404	9.36858
163102_r_at	RIKEN cDNA 4930503L19 gene	2.20402	10.8744
112056_at	retinoic acid receptor, alpha	2.20356	10.8008
137238_f_at	nucleolar and spindle associated protein 1	2.20109	0.476706
93895_s_at	inositol 1,4,5-triphosphate receptor 1	2.20101	13.4896
162047_f_at	PHD finger protein 7	2.20078	11.3751
165665_at	RAD51 homolog (S. cerevisiae)	2.20059	12.6576
134253_at	RIKEN cDNA 3230402G14 gene	2.20052	16.4743
163783_at	PDGFA associated protein 1	2.20032	10.2422
162778_at	B-box and SPRY domain containing	2.20017	10.3419
104261_at	ESTs, Moderately similar to T17285 hypothetical protein DKFZp434N0535.1 - human (fragment) [H.sapiens]	2.19786	7.81579
108504_at	RIKEN cDNA 4631422O05 gene	2.19773	6.58499
110272_at	zinc finger CCCH type domain containing 1	2.19635	9.83955
160065_s_at	cysteine rich protein	2.19423	7.4558
171592_at	AV148526:AV148526 Mus musculus cDNA /clone=2810480A22 /clone_end=3' /gb=AV148526 /gi=5352659 /ug=Mm.53794 /len=302 /NOTE=replacement for probe set(s) 140148_at on MG-U74C	2.19417	3.23337
94367_at	uridine-cytidine kinase 2	2.19376	12.9296
98938_at	RIKEN cDNA 1500026D16 gene	2.19203	14.3565
111896_at	RIKEN cDNA 1110061A14 gene	2.19147	7.90091
103978_at	RIKEN cDNA 5730454B08 gene	2.18895	14.8137
114458_at	muscleblind-like 2	2.18679	5.15055
111306_at	RIKEN cDNA A330045H12 gene	2.18445	6.36334
97148_at	expressed sequence C81431	2.18416	5.69021
99637_at	procollagen, type XV	2.18262	11.765
171497_f_at	solute carrier family 9 (sodium/hydrogen exchanger), isoform 3 regulator 2	2.18236	4.29104
95064_at	DNA segment, Chr 18, ERATO Doi 240, expressed	2.18174	11.6677
110218_at	syntrophin, basic 2	2.17887	10.6917
163309_s_at	hypothetical protein 9930109F21	2.17764	8.96975
116984_at	helicase with zinc finger domain	2.17709	9.1134
110246_at	heat shock protein 12B	2.17696	8.58499
98434_at	Rho guanine nucleotide exchange factor (GEF7)	2.17612	14.4223
96071_at	ribosomal protein S25	2.17598	8.7234
93327_at	RIKEN cDNA 1300011C24 gene	2.17579	12.2756
132556_at	AI597222:vi48b10.x1 Mus musculus cDNA, 3' end /clone=IMAGE-907003 /clone_end=3' /gb=AI597222 /gi=4606270 /ug=Mm.97166 /len=389	2.17354	4.70802
108251_at	Transcribed sequence with moderate similarity to protein ref:NP_570953.1 (M.musculus) CAMP [Mus musculus]	2.17342	10.5401
106004_at	protein tyrosine phosphatase, receptor type Z, polypeptide 1	2.17269	10.5411
117156_at	expressed sequence AI851072	2.17219	9.87388
108999_at	RIKEN cDNA 4930548G07 gene	2.17052	10.4652
116129_at	ladinin	2.16962	8.48888
112464_at	RIKEN cDNA 5033406L14 gene	2.1678	9.92764
104836_at	Transcribed sequences	2.16762	5.09957
134824_s_at	desert hedgehog	2.16753	7.56673
165304_at	AV245062:AV245062 Mus musculus cDNA, 3' end /clone=4831435P03 /clone_end=3' /gb=AV245062 /gi=6232521 /ug=Mm.49684 /len=244 /NOTE=replacement for probe set(s) 109895_f_at on MG-U74B	2.16627	6.10369
98096_f_at	RIKEN cDNA 2610019N19 gene	2.16605	13.5202
162080_f_at	RIKEN cDNA 2900008M13 gene	2.1648	11.0655
161127_i_at	ribosomal protein L24	2.16339	4.26062
102029_at	interleukin 16	2.16304	4.99042
104591_g_at	myocyte enhancer factor 2C	2.1613	11.5219
163332_at	RIKEN cDNA 9930104E21 gene	2.16092	8.75666
163490_at	dispatched homolog 1 (Drosophila)	2.16023	6.90202
95688_at	degenerative spermatocyte homolog (Drosophila)	2.15856	7.43382
114656_at	cardiac lineage protein 1	2.1584	10.7252
137016_at	Transcribed sequences	2.15692	1.46886
100448_at	activin A receptor, type II-like 1	2.15672	11.0048
97468_at	CDC28 protein kinase 1	2.15531	14.3046
165626_f_at	glucosaminyl (N-acetyl) transferase 2, I-branching enzyme	2.15516	16.3772
168597_at	RIKEN cDNA 2410114N07 gene	2.15512	0
137079_at	0 day neonate kidney cDNA, RIKEN full-length enriched library, clone:D630046A03 product:similar to ORF 2 PROTEIN (FRAGMENT) [Rattus norvegicus], full insert sequence	2.15503	0
93064_at	BCL2/adenovirus E1B 19 kDa-interacting protein 1, NIP2	2.15398	12.7444
168947_f_at	Hypothetical gene supported by BC030430 (LOC382098), mRNA	2.15069	14.2628
105260_at	nucleolar protein family 6 (RNA-associated)	2.15019	8.99494
100931_at	arylsulfatase A	2.14928	12.5601
161147_f_at	Mus musculus, Similar to DC13 protein, clone MGC:41298 IMAGE:1548292, mRNA, complete cds	2.14833	10.2466
105235_at	SLIT-ROBO Rho GTPase activating protein 1	2.14805	0
105658_at	AI788998:uk56f11.x1 Mus musculus cDNA, 3' end /clone=IMAGE-1973037 /clone_end=3' /gb=AI788998 /gi=5336714 /ug=Mm.38866 /len=588	2.1474	1.43418
113194_g_at	Rap guanine nucleotide exchange factor (GEF) 1	2.14723	8.27978
166392_r_at	Adult male testis cDNA, RIKEN full-length enriched library, clone:4930412A21 product:unclassifiable, full insert sequence	2.14683	3.1881
167754_at	AV223532:AV223532 Mus musculus cDNA, 3' end /clone=3830412B12 /clone_end=3' /gb=AV223532 /gi=6172910 /ug=Mm.77528 /len=265 /NOTE=replacement for probe set(s) 141165_at on MG-U74C	2.14526	13.1682
109407_at	expressed sequence AI481316	2.14501	4.42468
116158_at	RIKEN cDNA 2310001H17 gene	2.14406	9.53933
106638_at	RIKEN cDNA 4833445A08 gene	2.14394	6.98922
163471_at	EGF-like-domain, multiple 3	2.14293	10.1754
112196_at	Transcribed sequence with moderate similarity to protein ref:NP_286085.1 (E. coli) beta-D-galactosidase [Escherichia coli O157:H7 EDL933]	2.14233	10.3598
98943_at	replication protein A2	2.14063	8.7732
165503_i_at	AV089980:AV089980 Mus musculus cDNA /clone=2310046K16 /clone_end=3' /gb=AV089980 /gi=5237528 /ug=Mm.46654 /len=200 /NOTE=replacement for probe set(s) 131491_f_at on MG-U74C	2.14023	0
115474_g_at	tripartite motif protein 26	2.14014	10.6697
165677_at	RIKEN cDNA 1700011I11 gene	2.13947	9.74668
160106_at	capping protein (actin filament), gelsolin-like	2.13901	8.76277
165788_at	brain-specific angiogenesis inhibitor 1-associated protein 2	2.13857	0
98339_at	synaptotagmin 11	2.13828	14.7223
115520_at	tripartite motif protein 34	2.13736	10.5041
96245_at	DNA segment, Chr 11, ERATO Doi 619, expressed	2.13624	4.41819
115215_at	nuclear factor of activated T-cells, cytoplasmic, calcineurin-dependent 1	2.13372	8.69199
94963_at	vinculin	2.13329	14.542
168498_r_at	RIKEN cDNA 1110001M19 gene	2.13305	16.151
112373_at	expressed sequence AI840826	2.13244	2.67772
100041_at	RIKEN cDNA 3010027G13 gene	2.13141	13.8466
133188_at	Transcribed sequences	2.12928	15.616
101105_at	breakpoint cluster region protein 1	2.12715	7.89588
168334_at	monoamine oxidase A	2.1268	0
96915_f_at	RIKEN cDNA 1010001M12 gene	2.12561	14.8474
164161_s_at	RIKEN cDNA 1700025G04 gene	2.12295	4.10783
170412_f_at	AV333540:AV333540 Mus musculus cDNA, 3' end /clone=6330548F24 /clone_end=3' /gb=AV333540 /gi=6373592 /ug=Mm.93212 /len=318 /NOTE=replacement for probe set(s) 131842_f_at on MG-U74C	2.12212	12.9427
129927_i_at	claudin 7	2.12128	8.93542
105954_at	SH3/ankyrin domain gene 3	2.12047	9.45249
92504_at	Hus1 homolog (S. pombe)	2.11947	3.59857
99184_at	cysteine sulfinic acid decarboxylase	2.1182	9.58078
96980_at	Cluster Incl U34303:Mus musculus nonmuscle myosin heavy chain IIB gene, promoter region and /cds=(75,419) /gb=U34303 /gi=1143215 /ug=Mm.88821 /len=420	2.1179	13.7335
161973_r_at	expressed sequence C76907	2.11764	13.9213
108244_at	RIKEN cDNA B430203I24 gene	2.11652	10.3058
112346_at	RIKEN cDNA 8430408G22 gene	2.11623	10.6233
94060_at	hypothetical protein MGC11654	2.11612	14.0708
113930_at	RIKEN cDNA 2310006J04 gene	2.11554	8.24375
106845_at	RIKEN cDNA 6330415M09 gene	2.11415	10.4277
164081_at	RIKEN cDNA 2700049P18 gene	2.11316	7.72243
99631_f_at	cytochrome c oxidase, subunit VI a, polypeptide 1	2.11291	13.8671
99908_at	paired box gene 4	2.11152	8.8443
169190_f_at	wingless-related MMTV integration site 5B	2.11062	1.5383
165357_f_at	cytochrome c oxidase, subunit VI a, polypeptide 1	2.10875	10.2807
98333_at	ribosomal protein S18	2.10786	5.42621
96526_at	expressed sequence AW111866	2.10655	11.3601
103423_at	cytochrome b-561	2.10518	10.4603
102731_g_at	histocompatibility 2, M region locus 3	2.10194	7.76852
115010_at	cDNA sequence BC042513	2.10118	7.31898
165146_f_at	expressed sequence 2 embryonic lethal	2.1011	10.6999
165193_i_at	Cbp/p300-interacting transactivator, with Glu/Asp-rich carboxy-terminal domain, 4	2.10101	8.60653
111812_at	RIKEN cDNA B130055N23 gene	2.10071	10.8819
106616_at	linker of T-cell receptor pathways	2.09997	8.07728
117196_at	SWAP complex protein	2.09984	10.4373
165278_r_at	heterogeneous nuclear ribonucleoprotein C	2.09871	7.14268
104011_at	aldehyde oxidase 1	2.09775	8.51942
133871_at	Transcribed sequence with moderate similarity to protein ref:NP_081764.1 (M.musculus) RIKEN cDNA 5730493B19 [Mus musculus]	2.0975	16.3852
167198_i_at	RIKEN cDNA 2310034P14 gene	2.09684	15.6343
163217_at	apoptosis, caspase activation inhibitor	2.09683	10.2734
96284_at	expressed sequence AI463719	2.09659	8.5373
107766_at	RIKEN cDNA 6330500A18 gene	2.09616	7.43748
110398_f_at	oogenesin 2	2.0961	8.70981
94112_at	tumor necrosis factor (ligand) superfamily, member 10	2.0934	14.0714
102792_at	uracil-DNA glycosylase	2.09272	14.5468
161679_r_at	telomeric repeat binding factor 2, interacting protein	2.09169	14.6349
164850_f_at	poliovirus receptor-related 2	2.09152	10.6892
95490_at	RIKEN cDNA 8030486F04 gene	2.09101	14.1939
130476_at	actin-binding LIM protein 2	2.09047	9.01619
112174_at	endothelial and smooth muscle cell-derived neuropilin-like molecule	2.0868	5.66967
164341_f_at	importin 7	2.0866	10.1345
110320_at	ELK4, member of ETS oncogene family	2.08613	9.64585
105699_at	RIKEN cDNA 6330509G02 gene	2.08442	0
115445_at	Transcribed sequences	2.08397	9.83606
97593_f_at	flightless I homolog (Drosophila)	2.08396	5.12388
104195_at	RIKEN cDNA 5730408K05 gene	2.08136	4.48135
109561_at	phosphatidylinositol-3-phosphatase associated protein	2.08112	10.6016
171168_r_at	claudin 6	2.08068	8.04085
113903_at	O-sialoglycoprotein endopeptidase-like 1	2.08068	8.98756
98471_f_at	kinesin family member C1	2.0796	14.1241
100011_at	Kruppel-like factor 3 (basic)	2.07854	13.8738
115760_at	cDNA sequence BC014795	2.07838	5.01743
99953_at	ral guanine nucleotide dissociation stimulator,-like 2	2.07811	9.46189
133763_at	potassium channel tetramerisation domain containing 12b	2.07617	12.0035
164034_at	expressed sequence AU041783	2.07609	7.61652
93731_at	FK506 binding protein 9	2.07381	10.6208
161875_at	fragile X mental retardation syndrome 1 homolog	2.07315	10.6747
103935_at	ATPase, Ca++ transporting, ubiquitous	2.07303	14.035
114323_at	differentially expressed in FDCP 6	2.07276	9.06048
113036_at	RIKEN cDNA 2310015I10 gene	2.0721	6.43597
160732_at	expressed sequence C85514	2.07078	11.703
161470_r_at	metal response element binding transcription factor 2	2.0705	12.5061
107074_at	guanosine monophosphate reductase	2.06886	8.05472
101372_at	thyroid hormone receptor interactor 13	2.06765	14.6869
163199_at	RIKEN cDNA 4632417N05 gene	2.06722	10.8223
95642_at	elongation of very long chain fatty acids (FEN1/Elo2, SUR4/Elo3, yeast)-like 1	2.06659	11.2733
164895_f_at	AV061684:AV061684 Mus musculus cDNA /clone=1810074O08 /clone_end=3' /gb=AV061684 /gi=5161431 /ug=Mm.75356 /len=269 /NOTE=replacement for probe set(s) 107723_f_at on MG-U74B	2.06389	2.08498
134746_at	AI662349:ms11f12.x1 Mus musculus cDNA, 3' end /clone=IMAGE-606671 /clone_end=3' /gb=AI662349 /gi=4765932 /ug=Mm.37265 /len=478	2.06336	0.0726023
106087_at	RIKEN cDNA E330027P08 gene	2.06237	8.3627
100015_at	Yamaguchi sarcoma viral (v-yes) oncogene homolog	2.06167	14.8187
96056_at	ras homolog gene family, member C	2.0613	11.5574
137545_at	AI662474:mt28c06.x1 Mus musculus cDNA, 3' end /clone=IMAGE-622378 /clone_end=3' /gb=AI662474 /gi=4766057 /ug=Mm.38137 /len=436	2.06001	11.0975
162241_r_at	t-complex testis expressed 1	2.05984	13.7978
94771_at	RIKEN cDNA 9030412M04 gene	2.05942	10.8945
94458_at	caspase 6	2.05939	13.6807
160593_at	sorting nexin 9	2.05878	1.28032
107483_at	RIKEN cDNA C030033F14 gene	2.05876	10.7397
163779_at	translocated promoter region	2.05839	9.80443
166862_at	RIKEN cDNA 9130013K24 gene	2.05833	14.7377
97405_at	ribosomal protein S6 kinase polypeptide 1	2.05821	10.6689
97269_f_at	RIKEN cDNA 0610010I12 gene	2.05816	10.7185
106277_at	SMC (structural maintenance of chromosomes 1)-like 1 (S. cerevisiae)	2.05745	8.6786
100345_f_at	vesicle-associated membrane protein 8	2.05736	11.6083
105591_at	RIKEN cDNA 6030440P17 gene	2.05732	1.64757
99865_at	bone morphogenic protein receptor, type II (serine/threonine kinase)	2.05584	11.6171
93962_at	expressed sequence AI848598	2.05538	13.6573
160742_at	procollagen-lysine, 2-oxoglutarate 5-dioxygenase 3	2.05439	14.1388
97297_at	RIKEN cDNA 1500036F01 gene	2.05389	12.0667
165988_r_at	AV371721:AV371721 Mus musculus cDNA, 3' end /clone=9030418O21 /clone_end=3' /gb=AV371721 /gi=6419368 /ug=Mm.46592 /len=242 /NOTE=replacement for probe set(s) 130007_r_at on MG-U74C	2.05377	0.782452
92308_at	protein tyrosine phosphatase, receptor-type, M	2.05329	12.5598
99074_at	villin	2.05289	13.8341
167426_at	RNA binding protein gene with multiple splicing	2.05276	2.25976
97239_at	RIKEN cDNA 4930455J02 gene	2.05066	3.6427
169024_f_at	CXXC finger 1 (PHD domain)	2.04868	16.3554
113006_r_at	RIKEN cDNA A030012M09 gene	2.04849	10.3998
104444_at	RIKEN cDNA 9430098E02 gene	2.04801	7.49398
95752_at	RIKEN cDNA 4733401P19 gene	2.04738	7.36806
110693_at	RIKEN cDNA C530050O22 gene	2.04731	3.80558
106031_at	10 days neonate skin cDNA, RIKEN full-length enriched library, clone:4732457F20 product:unknown EST, full insert sequence	2.0465	3.86387
104746_at	FK506 binding protein 7 (23 kDa)	2.04605	13.1478
111046_r_at	RIKEN cDNA 9030611N15 gene	2.04565	8.63353
162485_at	RIKEN cDNA 9130014I08 gene	2.04553	9.19745
115096_at	cDNA sequence BC040205	2.04345	5.90604
109622_at	SH3-domain binding protein 4	2.04241	8.38111
165006_f_at	elongation of very long chain fatty acids (FEN1/Elo2, SUR4/Elo3, yeast)-like 1	2.04232	4.68796
97819_at	glutathione S-transferase omega 1	2.04105	13.8611
130315_at	calpastatin	2.04092	16.4437
104423_at	RIKEN cDNA 2810047L02 gene	2.04025	9.01852
165010_f_at	procollagen-lysine, 2-oxoglutarate 5-dioxygenase 1	2.03949	10.8735
111650_at	glutamate-cysteine ligase, catalytic subunit	2.03885	10.3551
166840_r_at	RIKEN cDNA 3110038O15 gene	2.03881	13.9647
105324_at	Transcribed sequences	2.03871	7.86086
111483_at	ataxia, cerebellar, Cayman type homolog (human)	2.03847	9.37363
101469_at	neural precursor cell expressed, developmentally down-regulated gene 9	2.03799	14.4797
162486_f_at	Down syndrome critical region gene a	2.03761	9.82343
115505_at	zinc finger protein 91	2.03736	9.14357
140877_at	Transcribed sequences	2.03521	11.9094
95434_at	actin related protein 2/3 complex, subunit 3 (21 kDa)	2.03252	11.1901
98965_at	gene rich cluster, C3f gene	2.03251	9.22677
111235_at	protein kinase N3	2.03239	10.1412
161859_f_at	synuclein, gamma	2.03102	14.3177
136003_at	AW121798:UI-M-BH2.3-anx-a-11-0-UI.s2 Mus musculus cDNA, 3' end /clone=UI-M-BH2.3-anx-a-11-0-UI /clone_end=3' /gb=AW121798 /gi=6097156 /ug=Mm.82616 /len=385	2.03043	12.332
95772_r_at	frizzled homolog 4 (Drosophila)	2.03014	13.1084
94078_at	Mus musculus, Similar to ubiquinol-cytochrome c reductase complex (7.2 kD), clone MGC:37480 IMAGE:4984172, mRNA, complete cds	2.03007	11.2723
112385_at	glycophorin C	2.02961	4.17352
94346_at	Wilms' tumour 1-associating protein	2.02917	13.4677
110005_at	potassium inwardly-rectifying channel, subfamily K, member 6	2.02877	10.0148
102984_g_at	MAD homolog 1 (Drosophila)	2.02849	12.5173
138188_at	AW045568:UI-M-BH1-aks-f-11-0-UI.s1 Mus musculus cDNA, 3' end /clone=UI-M-BH1-aks-f-11-0-UI /clone_end=3' /gb=AW045568 /gi=5906097 /ug=Mm.44918 /len=440	2.02784	14.1361
114573_at	RIKEN cDNA F730014I05 gene	2.02746	8.8255
164043_at	Adult male testis cDNA, RIKEN full-length enriched library, clone:4921518K07 product:unclassifiable, full insert sequence	2.02741	9.38489
115082_at	Rho guanine nucleotide exchange factor (GEF) 12	2.02729	9.70616
102374_at	Down syndrome critical region gene 1-like 2	2.02624	13.1978
107009_at	Similar to MGC15476 protein (LOC381851), mRNA	2.02615	9.95629
160963_at	Mus musculus, clone IMAGE:5375863, mRNA, partial cds	2.02462	10.7289
104060_at	RIKEN cDNA 2700088M22 gene	2.02392	13.9799
139998_at	Transcribed sequences	2.02283	13.4035
103040_at	CD83 antigen	2.02175	9.74895
93551_at	RIKEN cDNA 2510029B14 gene	2.02085	10.5669
99186_at	cyclin A2	2.01899	1.76448
94503_at	cell line NK14 derived transforming oncogene	2.01893	12.8398
103617_at	decay accelerating factor 1	2.018	11.6893
100954_at	HIV-1 Rev binding protein	2.01659	12.7901
170368_r_at	AV172052:AV172052 Mus musculus cDNA /clone=3300003G19 /clone_end=3' /gb=AV172052 /gi=5378490 /ug=Mm.76468 /len=351 /NOTE=replacement for probe set(s) 131753_f_at on MG-U74C	2.01634	15.2297
170627_i_at	AU RNA binding protein/enoyl-coenzyme A hydratase	2.01551	15.2491
102639_at	carbohydrate sulfotransferase 2	2.01456	14.3734
102836_at	putative phosphatase	2.0145	14.6231
136652_at	Adult female vagina cDNA, RIKEN full-length enriched library, clone:9930036A08 product:weakly similar to PFTAIRE-INTERACTING FACTOR 2 [Drosophila melanogaster], full insert sequence	2.01432	16.6094
130920_at	Transcribed sequences	2.0139	13.3819
93066_at	granulin	2.01365	4.43098
95681_f_at	protein phosphatase 1, regulatory (inhibitor) subunit 2	2.01263	13.6126
162353_at	acidic ribosomal phosphoprotein PO	2.01242	3.54467
168137_at	3-oxoacid CoA transferase 2B	2.0117	12.4745
168374_at	carbonic anhydrase 15	2.01162	11.5752
111249_at	RIKEN cDNA 2310039E09 gene	2.01159	2.98842
116829_at	ceroid-lipofuscinosis, neuronal 5	2.01142	10.8507
164461_f_at	signal recognition particle receptor ('docking protein')	2.00973	1.55824
114312_g_at	ubiquitin carboxyl-terminal esterase L5	2.00884	10.7531
113790_at	Rho GTPase activating protein 18	2.00746	10.5843
113470_at	AI173114:uh94h05.r1 Mus musculus cDNA, 5' end /clone=IMAGE-1765401 /clone_end=5' /gb=AI173114 /gi=3720694 /ug=Mm.17411 /len=188	2.0073	6.39566
102234_at	RIKEN cDNA 1810037I17 gene	2.00683	0
112018_at	centromere protein E	2.00568	9.13469
116026_at	10 days neonate cerebellum cDNA, RIKEN full-length enriched library, clone:6530406L02 product:unknown EST, full insert sequence	2.00509	8.95461
96156_at	ESTs	2.00379	8.865
160389_r_at	ribosomal protein S27-like	2.00279	14.6065
162621_at	RIKEN cDNA 2610019P18 gene	2.0023	10.8582
163411_at	RIKEN cDNA 4932443D16 gene	2.00219	10.6149
167679_f_at	RIKEN cDNA 1700022N24 gene	2.00162	12.1605
140759_at	RIKEN cDNA 4831403C07 gene	2.00146	5.60251
139034_at	phosphate cytidylyltransferase 2, ethanolamine	2.0009	15.4118
102134_f_at	ATP synthase, H+ transporting, mitochondrial F0 complex, subunit c (subunit 9), isoform 2	2.00064	2.64514
116349_at	thyroid hormone receptor interactor 10	2.00049	10.4273
