# Supplementary material for: Arhgef15 Promotes Retinal Angiogenesis by Mediating VEGF-Induced Cdc42 Activation and Potentiating RhoJ Inactivation in Endothelial Cells
Source: PLoS One. 2012 Sep 21;7(9):e45858. doi: 10.1371/journal.pone.0045858 (PMC3448698; doi:10.1371/journal.pone.0045858)
Supplement: Dataset S2 — List of 96 probe sets for endothelial G proteins. (XLS) [file pone.0045858.s013.xls]

## Sheet: endothelial G proteins
	Probe set	Symbol	Name	Fold Change	Local FDR (%)	F-ratio	Gene Ontology term (molecular function_all)	Gene Ontology term (biological process_all)
1	116603_at	Rasgrp3	RAS, guanyl releasing protein 3	67.0164	2.02785	34.3304	GTPase binding, GTPase regulator activity, Ras GTPase binding, small GTPase binding, small GTPase regulator activity	regulation of GTPase activity, small GTPase mediated signal transduction
2	111711_at	Gimap8	GTPase, IMAP family member 8	26.3772	6.24566	7.08532	GTP binding
3	164116_at	Fgd5	FYVE, RhoGEF and PH domain containing 5	21.2811	8.18628	3.98243	GTPase regulator activity, small GTPase regulator activity
4	168116_f_at	Arhgap25	Rho GTPase activating protein 25	18.7921	1.92381	6.27089	GTPase activator activity, GTPase regulator activity
5	96172_at	Gimap4	GTPase, IMAP family member 4	18.618	2.53096	4.69231	GTP binding
6	106635_at	Gimap6	GTPase, IMAP family member 6	12.9309	5.58181	2.48599	GTP binding
7	107026_at	Gnb4	guanine nucleotide binding protein (G protein), beta 4	12.7769	6.13084	7.19323	GTP binding, GTPase activity, GTPase regulator activitysmall GTPase regulator activity,
8	92489_at	Gimap1	GTPase, IMAP family member 1	11.9367	8.35501	2.6407	GTP binding
9	105414_at	Gch1	GTP cyclohydrolase 1	11.7383	1.96861	2.86265	GTP cyclohydrolase I activity, GTP cyclohydrolase activity
10	104714_at	Dock9	dedicator of cytokinesis 9	11.6182	0	3.80126	GTP binding, GTPase binding, GTPase regulator activity, Rho GTPase binding, small GTPase binding, small GTPase regulator activity
11	99032_at	Rasd1	RAS, dexamethasone-induced 1	11.5281	14.6251	2.40045	GTP binding	small GTPase mediated signal transduction
12	166228_at	Stard13	StAR-related lipid transfer (START) domain containing 13	11.2506	15.004	0.438805	GTPase activator activity, GTPase regulator activity
13	103202_at	Gbp4	guanylate binding protein 4	10.1595	8.38166	10.5181	GTP binding, GTPase activity
14	112918_at	Centd1	centaurin, delta 1 (Arap2)	9.72673	7.13436	19.8079	GTPase activator activity, GTPase regulator activity
15	100561_at	Iqgap1	IQ motif containing GTPase activating protein 1	9.50011	2.45023	1.52518	GTPase activator activity, GTPase regulator activity, Ras GTPase activator activity, small GTPase regulator activity	negative regulation of small GTPase mediated signal transduction, regulation of small GTPase mediated signal transduction, small GTPase mediated signal transduction
16	92710_at	Rgnef	Rho-guanine nucleotide exchange factor	9.44693	5.98431	0.451643	GTPase regulator activity, small GTPase regulator activity
17	104146_at	Rasip1	Ras interacting protein 1	9.13631	13.1386	2.73792	GTPase binding, Ras GTPase binding, small GTPase binding
18	104949_at	Gimap5	GTPase, IMAP family member 5	8.51492	9.92793	0.962136	GTP binding
19	113016_at	Arhgef15	Rho guanine nucleotide exchange factor (GEF) 15	8.48619	0	6.56728	GTPase regulator activity, small GTPase regulator activity
20	115197_at	LOC670024	similar to Dedicator of cytokinesis protein 6	7.44149	0	5.15303	GTP binding, GTPase binding, GTPase regulator activity, small GTPase regulator activity
21	135347_at	Iqgap1	IQ motif containing GTPase activating protein 1	7.26081	0	0.839118	GTPase activator activity, GTPase regulator activity, Ras GTPase activator activity, small GTPase regulator activity	negative regulation of small GTPase mediated signal transduction, regulation of small GTPase mediated signal transduction, small GTPase mediated signal transduction
22	93949_at	Gnb4	guanine nucleotide binding protein (G protein), beta 4	6.66907	14.6769	0.777465	GTP binding, GTPase activity, GTPase regulator activitysmall GTPase regulator activity,
23	94377_at	Gng11	guanine nucleotide binding protein (G protein), gamma 11	6.26614	1.02662	1.90616	GTPase activity
24	116602_at	Rasgrp3	RAS, guanyl releasing protein 3	6.18322	3.02115	1.73333	GTPase binding, GTPase regulator activity, Ras GTPase binding, small GTPase binding, small GTPase regulator activity	regulation of GTPase activity, small GTPase mediated signal transduction
25	163318_at	Rapgef4	Rap guanine nucleotide exchange factor (GEF) 4	5.60672	5.82842	3.37142	GTPase regulator activity, small GTPase regulator activity,	small GTPase mediated signal transduction
26	94223_at	Net1	neuroepithelial cell transforming gene 1	5.42872	13.5788	1.06823	GTPase regulator activity, small GTPase regulator activity
27	103511_at	Arhgap8	Rho GTPase activating protein 8	5.14464	14.3334	0.916956	GTPase activator activity, GTPase regulator activity
28	101030_at	Rhob	ras homolog gene family, member B	5.13995	11.7361	0.631954	GTP binding, GTPase activity	small GTPase mediated signal transduction
29	104300_at	Iqgap1	IQ motif containing GTPase activating protein 1	5.00378	5.1541	6.69213	GTPase activator activity, GTPase regulator activity, Ras GTPase activator activity, small GTPase regulator activity	negative regulation of small GTPase mediated signal transduction, regulation of small GTPase mediated signal transduction, small GTPase mediated signal transduction
30	160961_at	Sipa1l2	signal-induced proliferation-associated 1 like 2	4.72646	9.82571	0.872192	GTPase activator activity, GTPase regulator activity
31	109377_at	Rapgef3	Rap guanine nucleotide exchange factor (GEF) 3	4.28755	0.208322	1.23361	GTPase regulator activitysmall GTPase regulator activity	small GTPase mediated signal transduction
32	97963_at	Sipa1	signal-induced proliferation associated gene 1	4.20209	13.966	1.04281	GTPase activator activity, GTPase regulator activity, Rap GTPase activator activity, small GTPase regulator activity
33	100880_at	Gbp7	guanylate binding protein 7	4.06188	14.3701	2.3108	GTP binding, GTPase activity
34	112351_at	Rapgef6	Rap guanine nucleotide exchange factor (GEF) 6	3.88762	9.38878	5.67014	GTPase regulator activity, small GTPase regulator activity	small GTPase mediated signal transduction
35	114550_at	Centd1	centaurin, delta 1 (Arap2)	3.81624	4.10681	0.464839	GTPase activator activity, GTPase regulator activity
36	102195_at	Map4k4	mitogen-activated protein kinase kinase kinase kinase 4	3.76624	1.30506	5.83282	GTPase regulator activity, small GTPase regulator activity
37	111379_at	Ehd4	EH-domain containing 4	3.64554	0	0.928509	GTP binding, GTPase activity
38	113309_at	Stard8	START domain containing 8	3.58562	0	1.64364	GTPase activator activity, GTPase regulator activity
39	115344_at	Rgs3	regulator of G-protein signaling 3	3.55567	0	3.9402	GTPase activator activity, GTPase regulator activity
40	106518_at	Ehd4	EH-domain containing 4	3.55485	0.569004	0.246316	GTP binding, GTPase activity
41	117108_at	Mpa2l	macrophage activation 2 like (Gbp6)	3.53151	3.86342	2.26881	GTP binding, GTPase activity
42	101584_at	Rsu1	Ras suppressor protein 1	3.48966	5.13943	1.00255		small GTPase mediated signal transduction
43	92805_s_at	Arl4a	ADP-ribosylation factor-like 4A	3.48476	12.8018	5.02442	GTP binding, GTPase activity	small GTPase mediated signal transduction
44	99596_f_at	Gnai2	guanine nucleotide binding protein (G protein), alpha inhibiting 2	3.46487	0	11.5496	GTP binding, GTPase activity
45	102767_at	Gng12	guanine nucleotide binding protein (G protein), gamma 12	3.31277	12.4131	2.43305	GTPase regulator activity, small GTPase regulator activity
46	131254_at	Fgd6	FYVE, RhoGEF and PH domain containing 6	3.30524	1.42586	0.976448	GTPase regulator activity, small GTPase regulator activity
47	113750_at	Rab32	RAB32, member RAS oncogene family	3.29595	10.403	0.452931	GTP binding	small GTPase mediated signal transduction
48	161473_f_at	Gng11	guanine nucleotide binding protein (G protein), gamma 11	3.27535	6.65855	0.0536292	GTPase activity
49	94394_at	Rras	Harvey rat sarcoma oncogene, subgroup R	3.20672	12.1192	7.40456	GTP binding	small GTPase mediated signal transduction
50	166330_i_at	Drg1	developmentally regulated GTP binding protein 1	3.17208	16.1609	0.0958465	GTP binding
51	171097_at	Bet1l	blocked early in transport 1 homolog (S. cerevisiae)-like	3.16044	16.6334	0.0693085	GTPase activator activity, GTPase regulator activity, small GTPase regulator activity
52	101112_g_at	Rhoa	ras homolog gene family, member A	3.09631	12.8993	2.01307	GTP binding, GTPase activity	small GTPase mediated signal transduction
53	92625_at	Nme2	non-metastatic cells 2, protein (NM23B) expressed in	3.08526	0.808498	1.33589		GTP biosynthesis, GTP metabolism
54	164866_f_at	Sh2d3c	SH2 domain containing 3C	3.0461	9.89013	0.851724	GTPase regulator activity, small GTPase regulator activity
55	104833_at	Srgap2	SLIT-ROBO Rho GTPase activating protein 2	3.03528	7.57887	1.01995	GTPase activator activity, GTPase regulator activity
56	137521_at	-	-	3.02816	16.2883	1.88139	GTPase activator activity, GTPase regulator activity	small GTPase mediated signal transduction
57	109832_f_at	-	-	3.00717	10.2275	1.40768	GTPase activator activity, GTPase regulator activity	regulation of GTPase activity
58	106596_at	Cdgap	Cdc42 GTPase-activating protein (Arhgap31)	2.95714	7.1825	2.8012	GTPase activator activity, GTPase regulator activity	small GTPase mediated signal transduction
59	115089_at	Rapgef5	Rap guanine nucleotide exchange factor (GEF) 5	2.91718	6.30107	2.48546	GTP-dependent protein binding, GTPase regulator activity, small GTPase regulator activity	small GTPase mediated signal transduction
60	96978_at	Sytl4	synaptotagmin-like 4	2.88059	9.25376	0.197971	GTPase binding, Rab GTPase binding, binding, small GTPase binding
61	164750_f_at	Rhog	ras homolog gene family, member G	2.83623	7.27377	0.119077	GTP binding, GTPase activity	small GTPase mediated signal transduction
62	96516_at	Srgap2	SLIT-ROBO Rho GTPase activating protein 2	2.83596	10.6142	0.506504	GTPase activator activity, GTPase regulator activity
63	167092_f_at	1810048P08Rik	RIKEN cDNA 1810048P08 gene (Rab43)	2.83141	7.92304	1.44762	GTP binding	small GTPase mediated signal transduction
64	164074_at	Tbc1d4	TBC1 domain family, member 4	2.8233	6.1604	0.218429	GTPase activator activity, GTPase regulator activity
65	163282_at	Rhobtb1	Rho-related BTB domain containing 1	2.78344	10.5264	1.93783	GTP binding	small GTPase mediated signal transduction
66	165105_f_at	Gng12	guanine nucleotide binding protein (G protein), gamma 12	2.70693	7.7334	0.388193	GTPase regulator activity, small GTPase regulator activity
67	92854_at	Rab11a	RAB11a, member RAS oncogene family	2.67837	9.17031	2.99211	GTP binding, GTPase activity	small GTPase mediated signal transduction
68	108805_f_at	Arl4a	ADP-ribosylation factor-like 4A	2.66257	10.1707	2.6539	GTP binding, GTPase activity	small GTPase mediated signal transduction
69	107591_at	Rhoj	ras homolog gene family, member J	2.65241	5.76414	1.46002	GTP binding, GTPase activity	small GTPase mediated signal transduction
70	98141_at	Eif5b	eukaryotic translation initiation factor 5B	2.63353	14.6086	1.22672	GTP binding
71	114629_at	Arhgef2	rho/rac guanine nucleotide exchange factor (GEF) 2	2.57543	8.96928	0.654869	GTPase binding, GTPase regulator activity, Rac GTPase binding, Rho GTPase binding, small GTPase binding, small GTPase regulator activity	regulation of small GTPase mediated signal transduction, small GTPase mediated signal transduction
72	110710_at	Gimap3	GTPase, IMAP family member 3	2.57356	8.34177	0.0693878	GTP binding
73	109813_f_at	Git2	G protein-coupled receptor kinase-interactor 2	2.56087	10.503	2.46181	GTPase activator activity, GTPase regulator activity	regulation of GTPase activity
74	108710_at	Git2	G protein-coupled receptor kinase-interactor 2	2.54547	8.64328	0.587382	GTPase activator activity, GTPase regulator activity	regulation of GTPase activity
75	100958_at	Spata13	spermatogenesis associated 13	2.50276	12.1917	2.55254	GTPase regulator activity, small GTPase regulator activity
76	134302_at	Rasgrp3	RAS, guanyl releasing protein 3	2.48609	11.0621	0.249055	GTPase binding, GTPase regulator activity, Ras GTPase binding, small GTPase binding, small GTPase regulator activity	regulation of GTPase activity, small GTPase mediated signal transduction
77	97411_at	Ect2	ect2 oncogene	2.45488	12.6147	0.395167	GTPase regulator activity, small GTPase regulator activity
78	104065_at	Edem1	ER degradation enhancer, mannosidase alpha-like 1	2.43145	8.65812	0.183848	GTP binding
79	111412_at	Setd6	SET domain containing 6	2.42876	7.57757	1.82813	GTPase regulator activity, small GTPase regulator activity
80	161026_s_at	Sytl4	synaptotagmin-like 4	2.40755	12.0773	0.839023	GTPase binding, Rab GTPase binding, small GTPase binding
81	168491_at	Arhgap20	Rho GTPase activating protein 20	2.37074	17.1949	0.13746	GTPase activator activity, GTPase regulator activity
82	109494_at	Dock1	dedicator of cytokinesis 1	2.32037	2.28826	1.75588	GTP binding, GTPase binding, GTPase regulator activity, small GTPase regulator activity
83	164066_at	Rap2b	RAP2B, member of RAS oncogene family	2.31862	7.39344	0.05511	GTP binding	small GTPase mediated signal transduction
84	163609_at	Dock1	dedicator of cytokinesis 1	2.2238	8.88973	2.22353	GTP binding, GTPase binding, GTPase regulator activity, small GTPase regulator activity
85	161139_f_at	Ddef1	development and differentiation enhancing factor 1 (Asap1)	2.22106	0	0.324767	GTPase activator activity, GTPase regulator activity	regulation of GTPase activity
86	162576_at	Rras2	related RAS viral (r-ras) oncogene homolog 2	2.20981	7.24629	1.38159	GTP binding, GTPase activity	small GTPase mediated signal transduction, transport
87	98434_at	Arhgef7	Rho guanine nucleotide exchange factor (GEF) 7	2.17612	14.4223	2.33866	GTPase regulator activity, small GTPase regulator activity
88	113194_g_at	Rapgef1	Rap guanine nucleotide exchange factor (GEF) 1	2.14723	8.27978	1.49039	GTPase regulator activity, small GTPase regulator activity
89	165788_at	Baiap2	brain-specific angiogenesis inhibitor 1-associated protein 2	2.13857	0	0.754561		small GTPase mediated signal transduction
90	99953_at	Rgl2	ral guanine nucleotide dissociation stimulator-like 2	2.07811	9.46189	2.09945	GTPase regulator activity, small GTPase regulator activity	small GTPase mediated signal transduction
91	96056_at	Rhoc	ras homolog gene family, member C	2.0613	11.5574	1.36219	GTP binding	small GTPase mediated signal transduction
92	93962_at	Rap1a	RAS-related protein-1a	2.05538	13.6573	1.70752	GTP binding, GTPase activity	small GTPase mediated signal transduction
93	115082_at	Arhgef12	Rho guanine nucleotide exchange factor (GEF) 12	2.02729	9.70616	6.69132	GTPase activator activity, GTPase regulator activity, small GTPase regulator activity
94	94503_at	Rab8a	RAB8A, member RAS oncogene family	2.01893	12.8398	0.973368	GTP binding
95	100954_at	Hrb	HIV-1 Rev binding protein (Agfg1)	2.01659	12.7901	0.37756		regulation of GTPase activity
96	164461_f_at	Srpr	signal recognition particle receptor ('docking protein')	2.00973	1.55824	0.397919	GTP binding, GTPase activity
